# Supplementary material for: Intellicount: High-Throughput Quantification of Fluorescent Synaptic Protein Puncta by Machine Learning
Source: eNeuro. 2017 Dec 6;4(6):ENEURO.0219-17.2017. doi: 10.1523/ENEURO.0219-17.2017 (PMC5718246; doi:10.1523/ENEURO.0219-17.2017)
Supplement: Extended Data 1 — File contains two MATLAB files and user guide. Download Extended Data 1, ZIP file. [file sup_enu-eN-MNT-0219-17-s02.zip]

Archive with 10 entries (7 files):
- Code on website/
- Code on website/Intellicount User Guide.pdf
- __MACOSX/
- __MACOSX/Code on website/
- __MACOSX/Code on website/._Intellicount User Guide.pdf
- Code on website/synapse_quant.fig
- __MACOSX/Code on website/._synapse_quant.fig
- Code on website/synapse_quant.m
- __MACOSX/Code on website/._synapse_quant.m
- __MACOSX/._Code on website
