# Supplementary material for: Intellicount: High-Throughput Quantification of Fluorescent Synaptic Protein Puncta by Machine Learning
Source: eNeuro. 2017 Dec 6;4(6):ENEURO.0219-17.2017. doi: 10.1523/ENEURO.0219-17.2017 (PMC5718246; doi:10.1523/ENEURO.0219-17.2017)
Supplement: Extended Data 1 — File contains two MATLAB files and user guide. Download Extended Data 1, ZIP file. [file sup_enu-eN-MNT-0219-17-s02.zip › Code on website/synapse_quant.m]

function varargout = synapse_quant(varargin)
% SYNAPSE_QUANT MATLAB code for synapse_quant.fig
%      SYNAPSE_QUANT, by itself, creates a new SYNAPSE_QUANT or raises the existing
%      singleton*.
%
%      H = SYNAPSE_QUANT returns the handle to a new SYNAPSE_QUANT or the handle to
%      the existing singleton*.
%
%      SYNAPSE_QUANT('CALLBACK',hObject,eventData,handles,...) calls the local
%      function named CALLBACK in SYNAPSE_QUANT.M with the given input arguments.
%
%      SYNAPSE_QUANT('Property','Value',...) creates a new SYNAPSE_QUANT or raises the
%      existing singleton*.  Starting from the left, property value pairs are
%      applied to the GUI before synapse_quant_OpeningFcn gets called.  An
%      unrecognized property name or invalid value makes property application
%      stop.  All inputs are passed to synapse_quant_OpeningFcn via varargin.
%
%      *See GUI Options on GUIDE's Tools menu.  Choose "GUI allows only one
%      instance to run (singleton)".
%
%      ?� 2017 Rutgers, The State University of New Jersey, All rights reserved.  Do not copy or reproduce without permission.?
%
% See also: GUIDE, GUIDATA, GUIHANDLES

% Edit the above text to modify the response to help synapse_quant

% Last Modified by GUIDE v2.5 31-Aug-2017 18:12:07

% Begin initialization code - DO NOT EDIT
gui_Singleton = 1;
gui_State = struct('gui_Name',       mfilename, ...
                   'gui_Singleton',  gui_Singleton, ...
                   'gui_OpeningFcn', @synapse_quant_OpeningFcn, ...
                   'gui_OutputFcn',  @synapse_quant_OutputFcn, ...
                   'gui_LayoutFcn',  [] , ...
                   'gui_Callback',   []);
if nargin && ischar(varargin{1})
    gui_State.gui_Callback = str2func(varargin{1});
end

if nargout
    [varargout{1:nargout}] = gui_mainfcn(gui_State, varargin{:});
else
    gui_mainfcn(gui_State, varargin{:});
end
% End initialization code - DO NOT EDIT


% --- Executes just before synapse_quant is made visible.
function synapse_quant_OpeningFcn(hObject, eventdata, handles, varargin)
% This function has no output args, see OutputFcn.
% hObject    handle to figure
% eventdata  reserved - to be defined in a future version of MATLAB
% handles    structure with handles and user data (see GUIDATA)
% varargin   command line arguments to synapse_quant (see VARARGIN)

% Choose default command line output for synapse_quant
handles.output = hObject;
set(handles.frame,'Visible','Off');
set(handles.dot_plot,'Visible','Off');
set(handles.cumulative_plot,'Visible','Off');
set(handles.open_file,'UserData',cd);
DATA_matrix = zeros(1000,1000,10,7,2);
set(handles.uipanel5,'UserData',DATA_matrix);
chanops = {'Red','Green','Blue'};
objops = {'Synapse','Cell'};
resops = {'256x256','512x512','1024x1024','2048x2048','Other'};
set(handles.resolution,'String',['Resolution',resops]);
set(handles.map2channel,'String',['Channel',chanops]);
set(handles.syn_chan,'String',['Select Channel',chanops]);
set(handles.obj_quant,'String',['Select Object',objops]);
% Update handles structure
guidata(hObject, handles);

% UIWAIT makes synapse_quant wait for user response (see UIRESUME)
% uiwait(handles.figure1);


% --- Outputs from this function are returned to the command line.
function varargout = synapse_quant_OutputFcn(hObject, eventdata, handles) 
% varargout  cell array for returning output args (see VARARGOUT);
% hObject    handle to figure
% eventdata  reserved - to be defined in a future version of MATLAB
% handles    structure with handles and user data (see GUIDATA)

% Get default command line output from handles structure
varargout{1} = handles.output;


% --- Executes on slider movement.
function thresh1_Callback(hObject, eventdata, handles)
% hObject    handle to thresh1 (see GCBO)
% eventdata  reserved - to be defined in a future version of MATLAB
% handles    structure with handles and user data (see GUIDATA)

% Hints: get(hObject,'Value') returns position of slider
%        get(hObject,'Min') and get(hObject,'Max') to determine range of slider
threshold = get(hObject,'Value');
set(hObject,'UserData',threshold);
set(handles.T1,'String',threshold);

% --- Executes during object creation, after setting all properties.
function thresh1_CreateFcn(hObject, eventdata, handles)
% hObject    handle to thresh1 (see GCBO)
% eventdata  reserved - to be defined in a future version of MATLAB
% handles    empty - handles not created until after all CreateFcns called

% Hint: slider controls usually have a light gray background.
if isequal(get(hObject,'BackgroundColor'), get(0,'defaultUicontrolBackgroundColor'))
    set(hObject,'BackgroundColor',[.9 .9 .9]);
end


% --- Executes on slider movement.
function thresh2_Callback(hObject, eventdata, handles)
% hObject    handle to thresh2 (see GCBO)
% eventdata  reserved - to be defined in a future version of MATLAB
% handles    structure with handles and user data (see GUIDATA)

% Hints: get(hObject,'Value') returns position of slider
%        get(hObject,'Min') and get(hObject,'Max') to determine range of slider
thresh2 = get(hObject,'Value');
set(hObject,'UserData',thresh2);
set(handles.T2,'String',thresh2);

% --- Executes during object creation, after setting all properties.
function thresh2_CreateFcn(hObject, eventdata, handles)
% hObject    handle to thresh2 (see GCBO)
% eventdata  reserved - to be defined in a future version of MATLAB
% handles    empty - handles not created until after all CreateFcns called

% Hint: slider controls usually have a light gray background.
if isequal(get(hObject,'BackgroundColor'), get(0,'defaultUicontrolBackgroundColor'))
    set(hObject,'BackgroundColor',[.9 .9 .9]);
end


% --- Executes on slider movement.
function thresh3_Callback(hObject, eventdata, handles)
% hObject    handle to thresh3 (see GCBO)
% eventdata  reserved - to be defined in a future version of MATLAB
% handles    structure with handles and user data (see GUIDATA)

% Hints: get(hObject,'Value') returns position of slider
%        get(hObject,'Min') and get(hObject,'Max') to determine range of slider
thresh3 = get(hObject,'Value');
set(hObject,'UserData',thresh3);
set(handles.T3,'String',thresh3);

% --- Executes during object creation, after setting all properties.
function thresh3_CreateFcn(hObject, eventdata, handles)
% hObject    handle to thresh3 (see GCBO)
% eventdata  reserved - to be defined in a future version of MATLAB
% handles    empty - handles not created until after all CreateFcns called

% Hint: slider controls usually have a light gray background.
if isequal(get(hObject,'BackgroundColor'), get(0,'defaultUicontrolBackgroundColor'))
    set(hObject,'BackgroundColor',[.9 .9 .9]);
end


% --- Executes on button press in open_button.
function open_button_Callback(hObject, eventdata, handles)
% hObject    handle to open_button (see GCBO)
% eventdata  reserved - to be defined in a future version of MATLAB
% handles    structure with handles and user data (see GUIDATA)
folder = uigetdir();% open selection box
cd(folder);
set(handles.open_file,'String',folder);
set(handles.start_button,'UserData',folder);
%hopen = waitbar(0,'Opening selected file...');
fileloc2 = struct2cell(dir(folder));% struct to cell puts fileloc in matrix form
set(handles.folder_n,'UserData',(fileloc2));
cd(get(handles.open_file,'UserData'));
%***************************************
% Since some folders contain stored hidden files in
% the folder, the program offsets the first file by either 2 or 3.  If
% there were previous files, the offset must be 1 greater.


% --- Executes on button press in start_button.
function start_button_Callback(hObject, eventdata, handles)
% hObject    handle to start_button (see GCBO)
% eventdata  reserved - to be defined in a future version of MATLAB
% handles    structure with handles and user data (see GUIDATA)
clear Data DATA

testvar = 0;

% Select directory
if get(handles.folder_n,'Value')==1
    i_nested = 1;
    fileloc2 = get(handles.open_file,'String');
    fileDir = struct2cell(dir(fileloc2));
    cd(fileloc2);
    
    % if folder has extra .DS_Store file, increase the offset for first
    % file
    if strcmp(fileDir(1,3),'.DS_Store')
        offset2 = 1;
    else
        offset2 = 0;
    end
    foldersloop = length(dir(fileloc2))-2-offset2;
    set(handles.total_round,'String',num2str(foldersloop));
else
    % If not running the nested option, loop variables are set to run once
    % through
    foldersloop = 1; % max number of loops
    i_nested = 1; % current iteration
end

% Empty data variables for pre-allocation
map_area = zeros(30,2,8);
soma_area = zeros(30,2,8); 
filenames = strings(100,8);
F2col = strings(foldersloop,1);
Soma_collect = zeros(50,7,8); % save up to 7 soma per image for 8 rounds

while i_nested<=foldersloop
    
% Obtain file name
folder = get(handles.start_button,'UserData'); % whatever folder the user selects

% Obtain the direction for the nested folder option
if get(handles.folder_n,'Value')==1
    d = (struct2cell(dir(folder)));
    F = strcat(folder,'/',d(1,3+offset2+i_nested-1));
    F2 = cell2mat(F);
    fileloc = struct2cell(dir(F2)); 
    cd(F2);
else
    % Reset directory to selected folder
    fileloc = struct2cell(dir(folder));
    cd(folder);
end
%set(handles.bg_factor_slider,'UserData',F2col);

% Colors used in dot plot rounds
colors = {'r','b','g',[0 .7 .7],[1 0.5 0.5],[0 .7 0],[0.7 0.7 0.7], [0.5 0.5 0.5]};

% If running nested folders, the round variaable "userans" matches the
% iteration variable "i_nested", otherwise, the user inputs the data round (this will plot different sets of data)
if get(handles.folder_n,'Value')==1
    userans = i_nested;
else
    if isempty(get(handles.data_round,'UserData'))
        userans = 1; % if no round variable is chosen (either by the program or user), it defaults to round 1.
        set(handles.data_round,'String',num2str(userans));
    else
        userans = get(handles.data_round,'UserData');
    end
end

% Save the folder name for data export 
if get(handles.folder_n,'Value')==1
    F2col(i_nested) = F2;
else
    F2col(userans) = folder;
end
set(handles.bg_factor_slider,'UserData',F2col);
checkDS = fileloc(1,3); % get the name of the 3rd file

if strcmp(checkDS,'.DS_Store') % if the name is DS_Store
    offset = 3; % skip past it
else
    offset = 2; % otherwise, just skip past the first two
end
%***************************************

fileNum = size(fileloc,2)-offset; % determines the number of images.

imrep = imread(char(fileloc(1,1+offset))); % representative image for sizing only.
if size(imrep,1)~=size(imrep,2)
    imrepSize = max(size(imrep));
    imrep = zeros(imrepSize,imrepSize);
end

% Prepare tables for data
set(handles.map2_area,'ColumnName',{'Area um^2','Intensity'});
set(handles.soma,'ColumnName',{'Area um^2','Intensity'});

% Matrices for storing images for plotting
if i_nested==1
    if get(handles.imcollect,'Value')==1
        % Pre-allocate space for storing images with traces.  This occupies
        % a lot of space.  Not recommended for large file numbers.
        IMcollect = zeros(size(imrep,1),size(imrep,2),3, fileNum,8);
    else
        % do nothing
        set(handles.frame_select,'Visible','Off');
    end
    areas_orig = zeros(1000,fileNum,8);
end

% Pre-allocation for mask collection.  Currently turned off.
%IMcollectMask = zeros(size(imrep,1),size(imrep,2),fileNum,7);

% FDM is Final Data Matrix.  Each location in 3rd dimension described
% below.
FDMval = get(handles.dot_plot,'UserData');
% for FDM:
    % FDM(:,:,1,:) = x values for dot plot
    % FDM(:,:,2,:) = y values for dot plot (intensities)
    % FDM(:,:,3,:) = int/ste values for dot plot
    % FDM(:,:,4,:) = x values for cumulative plot
    % FDM(:,:,5,:) = y values for cumulative plot
    % FDM(:,:,6,:) = number_graph of files per round
% row = value iteration
% col = image number_graph
% z direction = different graph data
% t direction = # of rounds

% Check to see if there is data already loaded.
if isempty(FDMval)
    FDM = zeros(1000,fileNum,6,8); % 8 available rounds of data
else
    FDM = get(handles.dot_plot,'UserData');
end

% Pre-allocate MIG/G matrices for Machine learning
MIG = zeros(11,1);
MIGG = zeros(11,2);
MIG01 = zeros(11,1);
MIGG01 = zeros(11,2);

% Pre-allocate to collect areas and intensities of puncta over all thresholds
X = zeros(1000,1,fileNum);
Y = X;
Z = get(handles.intensity_graph,'UserData');
if isempty(Z)
    Z = zeros(1000,2,fileNum,8);
else
    Z = get(handles.intensity_graph,'UserData');
end


%%%%%%%%%%  BEGIN LOOPING THROUGH IMAGES  %%%%%%%%%%%%%%%%%%%%%%%%
% l is the main loop variable
for l = 1:fileNum % sets up loop to cycle through all images in the folder
    tic;
    % Reset machine learning loop variables
    mig = 0;
    mig02 = 0;
    i_count = 1;
    i_count1 = 1;
    doML = get(handles.mach_learn,'Value'); % check user answer for machine learning
    checkstatus = 1; % checkstatus is used to see where the program is in its optimization
    checkstatus1 = 1;
    
    % If single folder is selected, set the total number of rounds
    % temporarily to 1.
    if and(str2double(get(handles.data_round,'String'))==0, get(handles.folder_s,'Value')==1)
        set(handles.data_round,'String',userans);
    else
        if get(handles.folder_s,'Value')==1
            userans = str2double(get(handles.data_round,'String'));
        end
    end
    if str2double(get(handles.total_round,'String'))==0
        userans1round = 1;
        set(handles.total_round,'String',num2str(userans1round));
    else
        if isempty(get(handles.total_round,'String'))
            userans1round = 1;
            set(handles.total_round,'String',num2str(userans1round)); 
        end
    end

    % close previous waitbar
    if l>1
        close(hstart);
    end
    
    % Waitbar and its updates per image
    wb_round = (l-1)/fileNum*1/str2double(get(handles.total_round,'String'))+(userans-1)/str2double(get(handles.total_round,'String'));
    if l==fileNum
        wb_next = (l)/fileNum*1/str2double(get(handles.total_round,'String'))+(userans-1)/str2double(get(handles.total_round,'String'));
    else
        wb_next = (l)/fileNum*1/str2double(get(handles.total_round,'String'))+(userans-1)/str2double(get(handles.total_round,'String'));
    end
    wb_diff = wb_next - wb_round;
    hstart = waitbar(wb_round,['Analyzing... ( Image ', num2str(l), ' of ', num2str(fileNum), ', Round ',num2str(userans),' of ',get(handles.total_round,'String'),' )']);
   
    % Machine learning optimization variables
    t2opt = 0; % if t2 is optimized by ML, the value becomes 1
    moveIn = 0;
    moveIn3 = 0;
    
 % These while loops determine when the machine learning algorithm has
 % reached optimization.
while checkstatus ~=0 % to optimize 3rd threshold
while or(checkstatus1~=0, t2opt==1) % to optimize 2nd threshold
    if and(doML ==1, i_count1 == 1)
        checkstatus = 1; % checkstatus is used to see where the program is in its optimization
        checkstatus1 = 1;
    else
        if doML == 0
        checkstatus = 0; % checkstatus 0 means the program is optimized or not undergoing ML any longer
        checkstatus1 = 0;
        end
    end
    
% Hold thresholds constant and alter dilation sizes.
if get(handles.thresh1,'Value')==0
    if get(handles.sharpfilt,'Value')==0
        threshold = 30;  % default
    else
        threshold = 85;
    end
    set(handles.T1,'String',num2str(threshold)); % set the display value
    set(handles.thresh1,'Value',threshold); % set the bar display
else
    threshold = get(handles.thresh1,'Value');
end

if get(handles.thresh2,'Value')==0
    if get(handles.sharpfilt,'Value')==0
        thresh2 = 70;  % default
    else
        thresh2 = 120;
    end
    set(handles.T2,'String',num2str(thresh2));
    set(handles.thresh2,'Value',thresh2);
else
    thresh2 = get(handles.thresh2,'Value');
end

if get(handles.thresh3,'Value')==0
    if get(handles.sharpfilt,'Value')==0
        thresh3 = 220; % default  was 180
    else
        thresh3 = 230;
    end
    set(handles.T3,'String',num2str(thresh3));
    set(handles.thresh3,'Value',thresh3);
else
    thresh3 = get(handles.thresh3,'Value');
end

% Open the directory to extract the images.
if get(handles.folder_n,'Value')==1
    cd(F2);
else
    cd(folder) % change current directory
end

% convert the threshold values to double format
threshold = threshold/255;
thresh2 = thresh2/255;
thresh3 = thresh3/255;

% Open file for processing
i1 = imread(char(fileloc(1,l+offset))); % read the file
filenames(l,userans)=char(fileloc(1,l+offset)); % save the file name for data export

% Obtain the channel where the objects are located
synapseChan = get(handles.syn_chan,'Value');
    if synapseChan == 1
        syn_c = 1; % default as blue
    else
        if synapseChan == 2
            syn_c = 1;
        else
            if synapseChan == 3
                syn_c = 2;
            else 
                syn_c = 3;
            end
        end
    end

% Checks to see if the image is RGB    
if size(i1,3)>2%isa(i1,'rgb')
i1 = i1(:,:,1:3);% only RGB used.  Some images have a 4th channel, not sure what that is...
i2 = (i1(:,:,syn_c)); % convert red channel only to grayscale
else
    if size(i1,3)==1
        i2 = i1; % if grayscale
    else
        if isa(i1,'uint8')
            i2 = i1(:,:,syn_c);
        end
    end
end

% Define size conversion for image
% Pixel size cutoff definitions; based on image size
im_size = str2double(get(handles.edit6,'String'));
pixnum2 = get(handles.resolution,'Value');
if pixnum2 == 1
    pixnum = 1024; % default if nothing is selected
else
    if pixnum2 == 2
        pixnum = 256;
    else
        if pixnum2 == 3
            pixnum = 512;
        else 
            if pixnum2 == 4
                pixnum = 1024;
            else
                if pixnum2 == 5
                    pixnum = 2048;
                else
                    pixnum = size(i2,1);
                end
            end
        end
    end
end
set(handles.resolution,'UserData',pixnum);

% Determine max intensity level.
if isa(i1,'uint8')
    maxint = 255;
else
    if isa(i1,'uint16')  
        maxint = 65532;
    end
end

if im_size==0
    im_size = 101.5; % default image size in um
end
sizeconvo = pixnum/im_size; % (pixels/microns)

% Determine ranges for cutoffs based on size.  Maximum defined by user.  Default
% is 6.25um^2.  Minimum is 0.0256um^2.
maxSize = sqrt(str2double(get(handles.maxsize,'String')));
if get(handles.obj_quant,'Value') == 2
    pixbig = (round(pixnum*(maxSize/im_size),0))^2; % square because you want something 2.5um in width, not total size
    pixsmall = (round(pixnum*(.4/im_size),0))^2;
    step = 1; % the step size during machine learning. This is increase if cell identification is chosen.
else
    if get(handles.obj_quant,'Value')==3
        pixbig = (round(pixnum*(maxSize/im_size),0))^2; 
        pixsmall = (round(pixnum*(5/im_size),0))^2; 
        step = 2;
    else
        pixbig = (round(pixnum*(maxSize/im_size),0))^2; 
        pixsmall = (round(pixnum*(.16/im_size),0))^2; 
        step = 1;
    end
end

% Default dilation values
if i_count1 ==1
    if doML == 0
        % Default value
        t2dilate = 1; 
    else
        if get(handles.obj_quant,'Value')==3
            t2dilate = 10;
        else
            t2dilate = 9; 
        end
    end
end
if i_count ==1
    if doML == 0
        % Default value
        t3dilate = 1;
    else
        if get(handles.obj_quant,'Value')==3
            t3dilate = 10;
        else
            t3dilate = 9; 
        end
    end
end

% Filtering added 1/18/17.  This aids in segmentation.
f = fspecial('unsharp',1); % sharpens the image before processing.
if get(handles.sharpfilt,'Value')==0
    i22 = imfilter(i2,f); % apply filter
else
    i22 = i2; % can be turned off under High background conditions.
end

i2 = im2double(i22); % convert to double
ig = mat2gray(imgradient(i2,'sobel')); % get first derivative
igg = mat2gray(imgradient(ig,'sobel'));% get second derivative

i3 = im2bw(i2,threshold); % threshold by thresh1
i4 = im2bw(i2,thresh2); % threshold by thresh2
i5 = im2bw(i2,thresh3); % threshold by thresh3
i6 = bwareaopen(i3,2);  % remove anything smaller than 2 pixels

% If MAP2 and Soma are used for correlation, perform a size exclusion prior
% to watershed to limit background objects in the soma from being included.
if get(handles.mapsoma,'Value')==1
    i4 = imclose(i4,strel('disk',2));
    i4a = bwareaopen(i4,(round(pixnum*(2.5/im_size),0))^2); % segment anything larger than 2.5 um square length, then subtract out
    i4 = i4 - i4a;
end
i6_2 = bwareaopen(i4,2);
i6_3 = bwareaopen(i5,2);
i6 = imfill(i6,'holes'); % fill holes in white space

% For dilations, if puncta are chosen, use a square, if cells, then use
% disk.  Square dilation enables smaller steps for optimization than does disk.
if get(handles.obj_quant,'Value')==3
    strelstyle = 'disk';
else
    strelstyle = 'square';
end

% if testvar==0
%     figure, imshow(i6_3)
%     %testvar = 1;
% end
% Perform dilation to correct for area loss after thresholding.
i6_2 = imdilate(i6_2,strel(strelstyle,t2dilate)); 
i6_3 = imdilate(i6_3,strel(strelstyle,t3dilate));

% Watershed style also depends on size of objects. Euclidean will perform
% more objects divisions (i.e., more watersheds) than Cityblock.
if get(handles.obj_quant,'Value')==3
    ws_style = 'cityblock';
else
    ws_style = 'euclidean';
end
min_height = 0;


% Gradient threshold subtraction to remove background.  Code added 8/2/17%%%
i6_original = i6;
T1 = i6.*ig; % mask the gradient image by the threshold results.
T2 = imfill(T1,'holes'); % fill in holes to bunch large sections of background.

% Background removal factor from GUI
Tsizec_o = str2double(get(handles.bg_factor,'String'));

% Check to see if identified areas are larger than 10,000 pixels.
T1areas = regionprops(logical(i6),'Area');
T1a2 = cell2mat(struct2cell(T1areas));
max_areas = max(T1a2);
if max_areas>10000
    i6 = xor(bwareaopen(i6,2),bwareaopen(i6,10000));
end
T1stats = (regionprops(logical(i6),'PixelList'));

% For what remains, remove anything below the background removal factor
% cutoff.
for t = 1:length(T1stats)
    xcoords1 = T1stats(t).PixelList(:,2);
    ycoords1 = T1stats(t).PixelList(:,1);            
    Tmean = mean(T2(xcoords1,ycoords1));
    if Tmean<Tsizec_o
        i6(T1stats(t).PixelList(:,2),T1stats(t).PixelList(:,1)) = 0;
    end
end
clear xcoords1 ycoords1 Tmean

% Repeat the process for the other two thresholds.
T2_1 = i6_2.*ig;
T2_2 = imfill(T2_1,'holes');
T2areas = regionprops(logical(i6_2),'Area');
T2a2 = cell2mat(struct2cell(T2areas));
max_areas2 = max(T2a2);
if max_areas2>10000
    i6_2 = xor(bwareaopen(i6_2,2),bwareaopen(i6_2,10000));
end
T2stats = (regionprops(logical(i6_2),'PixelList'));
for t2 = 1:length(T2stats)
    T2mean = mean(T2_2(T2stats(t2).PixelList(:,2),T2stats(t2).PixelList(:,1)));
    if T2mean<Tsizec_o
        i6_2(T2stats(t2).PixelList(:,2),T2stats(t2).PixelList(:,1)) = 0;
    end
end
clear T2mean

T3_1 = i6_3.*ig;
T3_2 = imfill(T3_1,'holes');
T3areas = regionprops(logical(i6_3),'Area');
T3a2 = cell2mat(struct2cell(T3areas));
max_areas3 = max(T3a2);

% If the image channel is more saturated, do not eliminate as many objects,
% they may be true puncta.
sl = stretchlim(i1(:,:,syn_c));
sl2 = sl(2);
if sl2>0.7
    sizecutoff = 30000;
    Tsizec_o3 = Tsizec_o/2;
else
    sizecutoff = 10000;
    Tsizec_o3 = Tsizec_o;
end

if max_areas3>10000
    i6_3 = xor(bwareaopen(i6_3,2),bwareaopen(i6_3, sizecutoff));
end
T3stats = (regionprops(logical(i6_3),'PixelList'));
for t3 = 1:length(T3stats)
    %T3mean = mean(mean(T3_2(T3stats(t3).PixelList(:,2),T3stats(t3).PixelList(:,1))));
    T3mean1 = mean(mean((T3_2(T3stats(t3).PixelList(1:round(end/2,0),2),T3stats(t3).PixelList(1:round(end/2,0),1)))));
    T3mean2 = mean(mean((T3_2(T3stats(t3).PixelList(round(end/2,0)+1:end,2),T3stats(t3).PixelList(round(end/2,0)+1:end,1)))));
    T3mean3 = [T3mean1 T3mean2];
    T3mean = mean(T3mean3);
    if T3mean<Tsizec_o3
        i6_3d = im2double(i6_3);
        sg1 = mean(mean((i6_3d(T3stats(t3).PixelList(1:round(end/2,0),2),T3stats(t3).PixelList(1:round(end/2,0),1)))));
        sg2 = mean(mean((i6_3d(T3stats(t3).PixelList(round(end/2,0)+1:end,2),T3stats(t3).PixelList(round(end/2,0)+1:end,1)))));
        sg3 = [sg1 sg2];
        sg = mean(sg3);
        if sg>0.7
            % don't remove
        else
            i6_3(T3stats(t3).PixelList(:,2),T3stats(t3).PixelList(:,1)) = 0;
        end
    end
end
clear T3mean Tsizec_o3

% if testvar==0
%     figure, imshow(i6_3)
%     testvar = 1;
% end

if get(handles.watershed,'Value')==1
% Perform watershed algorithm on 2nd threshold results.
%%%%%%%%%%%%%%%%%%%%%%%%% Implement watershed algorithm%%%%%%%%%%%%%%%%%%%%
id1 = (bwdist(~i6_2,ws_style)); % apply distance calculation
id1 = -id1; % invert image
id1(~i6_2) = -Inf; % make background set to -infinity.  This creates a single background watershed.
id1 = imhmin(id1,min_height);
L1 = watershed(id1); % watershed it!
rgb1 = label2rgb(L1,'jet',[1 1 1]); % set watershed lines to white
%figure, imshow(rgb1)
rgb21 = rgb2gray(rgb1); % convert labeled image to grayscale
rgb21(rgb21~=255) = 0; % set any not white (that is, not a watershed line), to 0;
%figure, imshowpair(rgb21,i6_2); title(num2str(t2dilate));
rgb21 = ~rgb21; % invert to make the lines black.
%figure, imshow(rgb21);
i6_2 = im2double(rgb21).*i6_2; % multiplying the image puts the dividing line between the cells.
%%%%%%%%%%%%%%%%%%%%%%%%%% The watershed separation is complete.%%%%%%%%%%%

% Perform watershed algorithm on 3rd threshold results.
%%%%%%%%%%%%%%%%%%%%%%%%% Implement watershed algorithm%%%%%%%%%%%%%%%%%%%%
id = (bwdist(~i6_3,ws_style)); % apply distance calculation
id = -id; % invert image
id(~i6_3) = -Inf; % make background set to -infinity.  This creates a single background watershed.
id = imhmin(id,min_height);
L = watershed(id); % watershed it!

rgb = label2rgb(L,'jet',[1 1 1]); % set watershed lines to white
rgb2 = rgb2gray(rgb); % convert labeled image to grayscale
rgb2(rgb2~=255) = 0; % set any not white (that is, not a watershed line), to 0;
rgb2 = ~rgb2; % invert to make the lines black.
i6_3 = im2double(rgb2).*i6_3; % multiplying the image puts the dividing line between the cells.
%%%%%%%%%%%%%%%%%%%%%%%%% The watershed separation is complete.%%%%%%%%%%%
end

% Segment neurites based on other channel provided.  In most cases, this is
% MAP2.
%%%%%%%%%%%%%%%%%%% MAP2 correlation%%%%%%%%%%%%%%%%%%%%%%%%%%%%%%%%%%%%%%%%%%%%%
if and(i_count==1,i_count1==1)
    firstTime = 1;
else
    firstTime=0;
end
doMaP2 = get(handles.map2,'Value');
if doMaP2 == 0
    doSoma = get(handles.mapsoma,'Value');
    if doSoma == 1
        doMaP2 = 1;
    end
end

% find MAP2 channel
if doMaP2 == 1
    if firstTime==1 % only perform the MAP2 segmentation on the first iteration through machine learning.
    map2chan = get(handles.map2channel,'Value');
    if map2chan == 1
        channel = 3; % default as blue
    else
        if map2chan == 2
            channel = 1;
        else
            if map2chan == 3
                channel = 2;
            else 
                channel = 3;
            end
        end
    end
    % if MAP2 image is grayscale only
    if size(i1,3)==1
        channel = 1;
    end
    % mean intensity of map2 channel for threshold levels
    i1dub = im2double(i1);

    mapint = mean(mean(i1dub(:,:,channel)));
 
    adjustval = 0.05;
    if get(handles.highmap2,'Value')==1
        threshval = graythresh(i1(:,:,channel))+0.05;
        mi1 = i1(:,:,channel);
    else
        if mapint<0.1 % previously 10, before converted to double
            %mapint
            mi1 = i1(:,:,channel);
            mi1 = imadjust(mi1);

            % change 0.05
            threshval = graythresh(mi1)-adjustval;
            if threshval<=0
                threshval = 0.1;
            end
        else
            mi1 = i1(:,:,channel);
            % change 0.05
            threshval = graythresh(mi1)-adjustval;
        end
    end
    % opening sizes scaled to 102 um sized images by default.
    % convert sizes based on this ratio
    % 5/101.9 = 0.0491
    % 200/101.9 = 1.963
    % 50/101.9 = 0.491
    m_size = str2double(get(handles.edit6,'String'));
   
    m_size1 = round(m_size*0.0491);
    m_size2 = round(m_size*1.963);
    m_size3 = round(m_size*0.491);

    mi2 = im2bw(mi1,threshval);
    mi2aa = bwareaopen(mi2,m_size1);
    mi2a = imdilate(mi2aa,strel('disk',2));
    mi3 = bwareaopen(mi2a,m_size2);

    mi4 = bwareaopen(~mi3,m_size3);
    mi4 = ~mi4;

    strelsize = round(str2double(get(handles.edit6,'String'))/5,0);
    mi5 = imerode(mi4,strel('disk',strelsize));
    mi6 = imdilate(mi5,strel('disk',round(strelsize*1,0)));
    mi6e = edge(mi6,'canny');
    mi6e = imdilate(mi6e,strel('disk',2));

    % mi6 is the soma segmentation. Now subtract to get branches.
    if get(handles.mapsoma,'Value')==1
        mi7 = mi4;
        mi8 = imopen(mi7,strel('disk',2));
    else
        mi7 = mi4-mi6;
        mi8 = imopen(mi7,strel('disk',2));
    end
    
    mi8e = edge(mi8,'canny');
    mi8e = imdilate(mi8e,strel('disk',1));

    % Convert MAP2 and Soma intensities and areas to either 8-bit or 16-bit
    % and um^2.  Then store data in GUI tables.
    map_area(l,1,userans) = sum(sum(mi8))/(sizeconvo^2);
    map_i = mi8.*im2double(mi1);
    map_i = mean(mean(map_i));
    map_area(l,2,userans) = map_i*maxint;
    set(handles.map2_area,'Data',map_area(:,:,userans));
    set(handles.map2_area,'UserData',map_area);

    soma_i = mi6.*im2double(mi1);
    soma_i = mean(mean(soma_i));
    soma_area(l,2,userans) = soma_i*maxint; 
    
    soma_a = regionprops(mi6,'Area');
    
%     if get(handles.mapsoma,'Value')==1
%         % Soma_collect has all soma values
%         Soma_collect(l,1:length(soma_a),userans) = cell2mat(struct2cell(soma_a));
%     end
    if length(soma_a)>1
        for a = 1:length(soma_a)
            soma_a2(a) = soma_a(a).Area/(sizeconvo^2);            
        end
        % Use the max value of all identified soma
        soma_area(l,1,userans) = max(soma_a2);   % only the max value stored here         
        if get(handles.mapsoma,'Value')==1
            Soma_collect(l,1:length(soma_a2),userans) = soma_a2;
        end
    else % if there are 1 or no soma
        if isempty(soma_a)
            soma_area(l,1,userans) = 0;
        else
            soma_area(l,1,userans) = soma_a(1).Area/(sizeconvo^2);
            if get(handles.mapsoma,'Value')==1
                Soma_collect(l,1:length(soma_a),userans) = soma_area(l,1,userans); % if there is only 1, then it's the max
            end
        end
    end
    clear soma_a2;
    set(handles.soma,'Data',soma_area(:,:,userans));
    set(handles.soma,'UserData',soma_area); % only the max values
    
    % Apply correlation distance through additional dilation.
    % use 1.5um away by default
    den_dist = str2double(get(handles.den_dist,'String'))*sizeconvo; % distance converted to pixels
    dendstrel = round(den_dist,0);
    mi9 = imdilate(mi8,strel('disk',dendstrel));
    i6 = i6.*mi9;
    i6_2 = i6_2.*mi9;
    i6_3 = i6_3.*mi9;
    else % if not the first time through machine learning, then just use the previous MAP2/soma results again.
        i6 = i6.*mi9;
        i6_2 = i6_2.*mi9;
        i6_3 = i6_3.*mi9;
    end
end

%%%%%%% Discrimination criteria: second size and eccentricity%%%%%%%%%%%%%%%%%%%%%
% Remove elements greater than or less than size cuttoffs
% i6 = xor(bwareaopen(i6,pixsmall),bwareaopen(i6,pixbig));
% 
% if i_count<2 % if we are doing the first round of ML for thresh2...     
%     i6_2 = xor(bwareaopen(i6_2,pixsmall),bwareaopen(i6_2,pixbig));
% end
% 
% if i_count1>1 % if we are doing the second round of ML for thresh3...
%     i6_3 = xor(bwareaopen(i6_3,pixsmall),bwareaopen(i6_3,pixbig));
% end
%figure, imshow(i6)
i6 = bwpropfilt(logical(i6),'Area',[pixsmall pixbig]);
i6_2 = bwpropfilt(logical(i6_2),'Area',[pixsmall pixbig]);
i6_3 = bwpropfilt(logical(i6_3),'Area',[pixsmall pixbig]);
%%%%%%%%%%%%%%%%%%%%%%%%%%%%%%%%%%%%%%%%%%%%%%%%%%%%%%%%%%%%%

% "Edge" traces the edge of each white blob (cell).  
i6e = edge(i6,'canny');
i6_2e = edge(i6_2,'canny');
i6_3e = edge(i6_3,'canny');

% Gradient processing: perform MIGG/G calculations and store values in
% matrix.
igsum2 = ig.*i6_2e;
iggsum2 = igg.*i6_2e;
igsum = ig.*i6_3e; % multiply edge by first der.
iggsum = igg.*i6_3e; % multiply edge by second der.

mig2 = mean(mean(igsum2));
migg2 = mean(mean(iggsum2));
mig3 = mean(mean(igsum)); % this average intensity represents how close the average trace is to the max first derivative peak
migg3 = mean(mean(iggsum)); % same for 2nd der.

% store values for future ref.
MIG01(i_count1,1) = mig2;
MIGG01(i_count1,1) = migg2;
MIGG01(i_count1,2) = t2dilate;
MIG(i_count,1) = mig3;
MIGG(i_count,1) = migg3;
MIGG(i_count,2) = t3dilate;

% Construct a composite image showing traces from all three thresholds. For
% visualization only.  Not a processing step.
I6e = zeros(size(i1,1),size(i1,2),3);
I6e(:,:,1) = i6e; % threshold 1 is red
I6e(:,:,2) = i6_2e; % threshold 2 is green      
I6e(:,:,3) = i6_3e; % threshold 3 is blue


% Construct a composite image of blobs from all three thresholds.  For
% visualization only.  Not a processing step.
I6 = zeros(size(i1,1),size(i1,2),3);
I6(:,:,1) = i6;
I6(:,:,2) = i6_2;
I6(:,:,3) = i6_3;

% Label the elements and determine parameters
I6l_1 = bwlabel(I6(:,:,1));
stats_1 = regionprops(I6l_1,'PixelList'); % pixel list gives list of pixels of each element
I6l_2 = bwlabel(I6(:,:,2));
stats_2 = regionprops(I6l_2,'PixelList','Centroid'); % Centroid needed to determine overlap with other threshold rounds
I6l_3 = bwlabel(I6(:,:,3));
stats_3 = regionprops(I6l_3,'Centroid','PixelList');

i6l = bwlabel(i6); % bwlabel assigns a number to each blob.
stats = regionprops(i6l,'Area','Eccentricity'); % find the properties of each blob.
stats2 = regionprops(bwlabel(i6_2),'Area','Eccentricity');
stats3 = regionprops(bwlabel(i6_3),'Area','Eccentricity');

% Collect information on area and eccentricity for all 3 thresholds.
for a2 = 1:length(stats)
    x(a2) = stats(a2).Area/(sizeconvo^2);
    y(a2) = stats(a2).Eccentricity;
end

for a3 = 1:length(stats2)
    x2(a3) = stats2(a3).Area/(sizeconvo^2);
    y2(a3) = stats2(a3).Eccentricity;
end

for a4 = 1:length(stats3)
    x3(a4) = stats3(a4).Area/(sizeconvo^2);
    y3(a4) = stats3(a4).Eccentricity;
end


    % Machine Learning - currently set for gradient optimization.
    if and(t2opt==0, doML == 1)
        % MACHINE LEARNING********************************************************
        % Added 1/19/2017; updated with dilation 2/9/17
        
        mig2 = round(mig2,4);
        mig02 = round(mig02,4);
        if and(mig2<mig02, moveIn == 0)
            t2dilate = t2dilate-step; % keep moving in until the second time it triggers
            if t2dilate <= -1
                t2dilate = 0;
            end
            checkstatus1 = 1;
            moveIn = 1;
        else
            
            if and(mig2>=mig02,checkstatus1==1)
            
                t2dilate = round(t2dilate-step,0); % shrink dilation if previous value is less than current value
                if t2dilate <= -1
                    t2dilate = 0;
                end
                mig02 = mig2; % update mig
                checkstatus1 = 1; % maintain checkstatus as +1 (moving towards center)
            else % if previous mig is greater than current mig, then edge is on the downslope of the first gradient.
                t2dilate = round(t2dilate+step,0); % move edge the other way
                checkstatus1 = -1; % shift checkstatus to -1 (moving away from center)
                mig02 = mig2; % update mig.

                migmax1 = max(MIGG01); % Set migmax as the maximum 2nd der. point found during the 1st der. search for its peak.
                
                if migg2>=migmax1(1) % If the current 2nd der values are greater (new max) or equal (same max) as what was previously found...
                    % Stop here
                    checkstatus1 = 0;  % set checkstatus = 0 to end loop
                    maxVal1 = max(MIGG01); % get the actual max value from the MIGG matrix.
                    maxVal1 = maxVal1(1); % take the first parameter (value)
                    [w1r,w1c] = find(MIGG01(:,1)==maxVal1); % find its location in the second column, which are the corresponding dilation values.
                    t2dilate = MIGG01(w1r(1),2); % set the dilation to the optimized dilation value.
                    t2opt = 1;
                    wb = ((l)/fileNum*(i_count/11+1)/2);
                    
                end
            end
        end      
    else % if doML is turned off, do not run ML
        % Proceed; checkstatus already set to 0.
        break; % exit loop
    end
    if i_count1>10
       break;
    end
    i_count1 = i_count1 + 1;
end % Final end for 2nd threshold dilation
    if doML == 1
         % Check the mean of the image first gradient (m.i.g.)
            if and(mig3>=mig,checkstatus==1)
                t3dilate = round(t3dilate-step,0); % shrink dilation if previous value is less than current value
                if t3dilate <= -1
                    t3dilate = 0;
                end
                mig = mig3; % update mig
                checkstatus = 1; % maintain checkstatus as +1 (moving towards center)
            else % if previous mig is greater than current mig, then edge is on the downslope of the first gradient.

                    t3dilate = round(t3dilate+step,0); % move edge the other way
                    checkstatus = -1; % shift checkstatus to -1 (moving away from center)
                    mig = mig3; % update mig.
                    migmax = max(MIGG); % Set migmax as the maximum 2nd der. point found during the 1st der. search for its peak.
                    if migg3>=migmax(1) % If the current 2nd der values are greater (new max) or equal (same max) as what was previously found...
                        % Stop here
                        checkstatus = 0;  % set checkstatus = 0 to end loop
                        t3opt = 1;
                        maxVal = max(MIGG); % get the actual max value from the MIGG matrix.
                        maxVal = maxVal(1); % take the first parameter (value)
                        [wr,wc] = find(MIGG(:,1)==maxVal); % find its location in the second column, which are the corresponding dilation values.
                        t3dilate = MIGG(wr(1),2); % set the dilation to the optimized dilation value.
                    end
            end
    else
        break; % If not doing ML, then "break" for the while loops.
    end 
    if i_count>10 % stop if more than 10 steps are needed. It's possible it missed the peaks.  This prevents infinite loops.
        break; 
    end
    i_count = i_count+1; % increase i_count loop iterator
waitbar(wb_round+0.65*(i_count1-1+i_count-1)/20*wb_diff,hstart,['Analyzing... ( Image ', num2str(l), ' of ', num2str(fileNum), ', Round ',num2str(userans),' of ',get(handles.total_round,'String'),' )']);
end % Final end for 3rd threshold dilation

waitbar(wb_round+0.7*wb_diff,hstart,['Analyzing... ( Image ', num2str(l), ' of ', num2str(fileNum), ', Round ',num2str(userans),' of ',get(handles.total_round,'String'),' )']);
set(handles.t2dil,'String',num2str(t2dilate));
set(handles.t3dil,'String',num2str(t3dilate));

% Optional dilation warning.  If the second dilation value is greater than
% the third, the traces may not be optimized.  Theoritically, T3 should
% always be greater than T2.
if and(t2dilate>t3dilate,t3dilate~=0)
    %warndlg('Dilation parameters may not be optimized!','Warning');
    %set(handles.notopt,'Visible','On');
end
clear stats;
%%%%%                   MACHINE LEARNING SECTION COMPLETED %%

% Optional figure printing for program analysis.

% figure, imshow(mi8e);
% figure, imshow(mi8);

% figure, imshowpair(i6_original,i6_new);

% figure, imshow(ig);
% figure, imshow(igg);
% figure, imshow(i2(:,:,1));

% figure, imshowpair(i6,i2,'montage'); title(['figure ',filenames(l,userans)]);
% figure, imshowpair(i6_2,i2,'montage');title(['figure ',filenames(l,userans)]);
% figure, imshowpair(i6_3,i2,'montage'); title(['figure ',filenames(l,userans)]);
% 
% figure, imshow(mi6);
% figure, imshowpair(ig,igg);
% figure, imshowpair(i6_2e,ig)
% figure, imshowpair(i6_2e,igg);

%%%%%%% Discrimination criteria: size and eccentricity%%%%%%%%%%%%%%%%%%%%%

% figure, imshow(I6l_1)
% figure, imshow(I6l_2);
% figure, imshow(I6l_3);
%figure, imshow(I6)
% Remove elements with eccentricity greater than cutoff.
ecc = 0.9; % 0.9 default
for n = 1:3
    I6l = logical(I6(:,:,n));
    stats = regionprops(I6l,'Area','Eccentricity'); % find the properties of each blob.
    pixels = regionprops(I6l,'PixelList');
    for q = 1:length(stats)
        if stats(q).Eccentricity>ecc
            ycoords = pixels(q).PixelList(:,1);
            xcoords = pixels(q).PixelList(:,2);
            
            I6(xcoords,ycoords,n)=0;
        end
    end 
end
%%%%%%%%%%%%%%%%%%%%%%%%%%%%%%%%%%%%%%%%%%%%%%%%%%%%%%%%%%%%%%%%%%%%%%%%%%%     

waitbar(wb_round+0.8*wb_diff,hstart,['Analyzing... ( Image ', num2str(l), ' of ', num2str(fileNum), ', Round ',num2str(userans),' of ',get(handles.total_round,'String'),' )']);
 
%%%%%%%%%% CYCLE THROUGH TO REMOVE DOUBLE-LABELED ELEMENTS %%%%%%%%%%%%%%%%
for q = 1:length(stats_2) % find a centroid of second threshold
    y = round(stats_2(q).Centroid(1),0);
    x = round(stats_2(q).Centroid(2),0);
    label = I6l_1(x,y); % hypothetically, the centroid of any 2nd threshold blob should at least be a positive pixel in the first threshold.
    % unless the 1st threshold blob was removed in an earlier round! In
    % that case, check if it was by moving side to side, and if so, skip it.
    if label == 0
        if or(x==1,y==1)
            if x==length(I6l_1)
                xnew = x;
                ynew = y+1;
            else
                if y==length(I6l_1)
                    xnew = x+1;
                    ynew = y;
                else
                    xnew = x;
                    ynew = y;
                end
            end
            
            label = I6l_1(xnew,ynew);
        else
            label = I6l_1(x-1,y-1);
        end
        if label == 0
            % skip this element
        else
                x2 = stats_1(label).PixelList(:,2);
                y2 = stats_1(label).PixelList(:,1);
                I6(x2,y2,1)=0;   
        end
    else
                x2 = stats_1(label).PixelList(:,2);
                y2 = stats_1(label).PixelList(:,1);
                I6(x2,y2,1)=0;
    end
end
clear x y w r2 rr q; % clear loop iterators

% Repeat for threshold 3 co-localization with threshold 2

   for q = 1:length(stats_3)
        y3 = round(stats_3(q).Centroid(1),0);
        x3 = round(stats_3(q).Centroid(2),0);
        label3 = I6l_2(x3,y3);  % this tells you which element to eliminate
        label1 = I6l_1(x3,y3);  % the label of the ROI
        if label3 == 0
            if or(x3==1,y3==1)
                label3 = I6l_2(x3+1,y3+1);
            else
                label3 = I6l_2(x3-1,y3-1);
            end
            if label3 == 0
                % skip this element
            else
                    x23 = stats_2(label3).PixelList(:,2);
                    y23 = stats_2(label3).PixelList(:,1);

                    I6(x23,y23,2)=0;   

            end
        else
                    x23 = stats_2(label3).PixelList(:,2);
                    y23 = stats_2(label3).PixelList(:,1);

                    I6(x23,y23,2)=0;
                    
        end
        if label1 == 0 % if the red point under the blue ROI is 0
            if or(x3==1,y3==1)
                label1 = I6l_1(x3+1,y3+1);
            else
                label1 = I6l_1(x3-1,y3-1);
            end
            if label1 == 0
                % skip this element
            else

                    x21 = stats_1(label1).PixelList(:,2);
                    y21 = stats_1(label1).PixelList(:,1);
   
                    I6(x21,y21,1)=0;
            end
        else

                    x21 = stats_1(label1).PixelList(:,2);
                    y21 = stats_1(label1).PixelList(:,1);

                    I6(x21,y21,1)=0;
        end
    end
clear x y w r2 rr q; % clear loop iterators
imPreCheck = bwlabel(bwareaopen(im2bw(rgb2gray(I6),0),pixsmall),4);
PreCheckArea = regionprops(imPreCheck,'Area');
DoPrecheck = 0;
for pc = 1:length(PreCheckArea)
    PreCheck = cell2mat(struct2cell(PreCheckArea));
    if PreCheck(pc)>pixbig
        DoPrecheck = 1;
    end
end
if DoPrecheck == 1
I6l_1r = regionprops(I6(:,:,1),'PixelList');
for q = 1:length(I6l_1r)
    pixlist = struct2cell(I6l_1r);
    pixlist2 = cell2mat(pixlist(q));
    for q2 = 1:size(pixlist2,1)
        xx = pixlist2(q2,2);
        yy = pixlist2(q2,1);
        if xx+1>pixnum
            xxp1 = xx;
        else
            xxp1 = xx+1;
        end
        
        if xx-1<1
            xxm1 = xx;
        else
            xxm1 = xx-1;
        end
        
        if yy+1>pixnum
            yyp1 = yy;
        else
            yyp1 = yy+1;
        end
        
        if yy-1<1
            yym1 = yy;
        else
            yym1 = yy-1;
        end

        
        if or(I6(xxp1,yy,2),I6(xxm1,yy,2))
            I6(xx,yy,1) = 0;
        else
            if or(I6(xx,yyp1,2),I6(xx,yym1,2))
                 I6(xx,yy,1) = 0;
            else
                if or(I6(xxp1,yy,3),I6(xxm1,yy,3))
                    I6(xx,yy,1) = 0;
                else
                    if or(I6(xx,yyp1,3),I6(xx,yym1,3))
                         I6(xx,yy,1) = 0;
                    end
                end
            end
        end

    end
end
clear xx yy q q2 pixlist pixlist2 xxp1 xxm1 yyp1 yym1

I6l_2r = regionprops(I6(:,:,2),'PixelList');
for q = 1:length(I6l_2r)
    pixlist = struct2cell(I6l_2r);
    pixlist2 = cell2mat(pixlist(q));
    for q2 = 1:size(pixlist2,1)
        xx = pixlist2(q2,2);
        yy = pixlist2(q2,1);
        if xx+1>pixnum
            xxp1 = xx;
        else
            xxp1 = xx+1;
        end
        
        if xx-1<1
            xxm1 = xx;
        else
            xxm1 = xx-1;
        end
        
        if yy+1>pixnum
            yyp1 = yy;
        else
            yyp1 = yy+1;
        end
        if q==414
            %pixnum
            %[xx yyp1]
            %[xx yy]
        end
        
        if yy-1<1
            yym1 = yy;
        else
            yym1 = yy-1;
        end
%         if xx == 265
%             yy
%         end
        %yy
        if or(I6(xxp1,yy,3),I6(xxm1,yy,3))
            I6(xx,yy,2) = 0;
            %[xx yy]
            %[xxp1 yy]
        else
            if or(I6(xx,yyp1,3),I6(xx,yym1,3))
                 I6(xx,yy,2) = 0;
            end
        end

    end
end
end
%%%%%%%%%%%%%%%%%%%%%%%%%%%%%%%%%%%%%%%%%%%%%%%%%%%%%%%%%%%%%%%%%%%%%%%%%%%    
%figure, imshow(I6)
% Revert rgb image to gray after eliminating large features
i8 = rgb2gray(I6); 
%figure, imshow(i8)
i8 = im2bw(i8,0); % need to rebinarize the image after colorizing
waitbar(wb_round+0.9*wb_diff,hstart,['Analyzing... ( Image ', num2str(l), ' of ', num2str(fileNum), ', Round ',num2str(userans),' of ',get(handles.total_round,'String'),' )']);

% to remove artifacts of the watershed...
i8 = bwareaopen(i8,pixsmall,4); % remove anything smaller than pixel cutoff.
%figure, imshow(i8)
% i8e provides the final traces shown in the GUI.
i8e = edge(i8,'sobel');

% Apply traces.
i9 = i8.*mat2gray(i1(:,:,syn_c)); % multiply the "mask" by the original.

% Collect properties of identified puncta: size, intensity, and number.
i8l = bwlabel(i8,4); % bwlabel assigns a number to each blob.
stats = regionprops(i8l); % find the properties of each blob.
meanInt = regionprops(i8l,i9,'MeanIntensity');
pl = regionprops(i8l,'PixelList');
areas = regionprops(i8l,'Area');
 for rt = 1:length(areas)
     acell = cell2mat(struct2cell(areas));
     if acell(rt)>pixbig
         %rt
         pl2 = struct2cell(pl);
         cell2mat(pl2(rt))
     end
 end
if isa(i1,'uint8')
    maxint = 255;
else
    if isa(i1,'uint16')  
        maxint = 65532;
    end
end

int = transpose(cell2mat(struct2cell(meanInt)))*255; %maxint;

int2 = mean(int);  % mean intensity
intstd = std(int)/sqrt(length(int)); % ste for intensity values

DATA(1,1,l) = length(stats);
DATA(1:length(int),2,l) = int;
DATA(1:length(int),3,l) = transpose(cell2mat(struct2cell(areas)));

% rangefactor is used in dotplots only.  It is the x-width range assigned
% to any set of dots.  Data can be spread out more by increasing this
% value.
rangefactor = 0.4;

% Reassign userans value for plotting.  May not be necessary...
if get(handles.folder_n,'Value')==0
    userans = str2double(get(handles.data_round,'String'));
    if userans == 0
        userans = 1;
    end
else
    userans = i_nested;
end

hold on;

% Dot plot creation
% xvals = zeros(length(int),1);
% d = zeros(length(int),1);
% for p = 1:length(int)
%         if int(p) ==0
%             %break;
%         elseif and(int(p)<(mean(int)+5*std(int)),int(p)>(mean(int)-5*std(int)))
%             d(p) = abs(mean(int)-int(p));
%             range = 0.5/d(p)*8;
%             range(range>rangefactor) = rangefactor;
%             xvals(p) = (userans+(-range+(range--range).*rand(1,1)));
%         else
%             d(p) = abs(mean(int)-int(p));
%             range = 0.5/d(p);
%             range(range>rangefactor) = rangefactor;
%             xvals(p) = (userans+(-range+(range--range).*rand(1,1)));
%         end
% end
xvals = userans*ones(size(int,1),size(int,2));
% Store data in FDM.
FDM(1:length(xvals),l,1,userans) = xvals;
FDM(1:length(xvals),l,2,userans) = int; % for plotting later.
FDMx = xvals;
FDMy = int;

for q = 1:length(int)
    if FDMy(q) == 0
        FDMx(q) = 0;
    end
end

FDMx(FDMx==0) = [];
FDMy(FDMy==0) = [];

% Plot dot plot to GUI.
scatter(FDMx,FDMy,'jitter','on','jitterAmount',0.3,'MarkerEdgeColor',colors{userans},'Parent',handles.dot_plot);

imsize = str2double(get(handles.edit6,'String'));
if isempty(imsize)
    imsize = 101.5;
end
set(handles.edit6,'String',num2str(imsize));
set(handles.imsize,'UserData',imsize);
set(handles.dot_plot,'Visible','On');
hold off;

% Cumulative Distribution plot creation
ys = linspace(1,length(int),length(int))/length(int);
    if l == 1
        set(handles.cumulative_plot,'Visible','On');
    else
        
        hold on;
        hold off;
        xlabel('Area (\mum^{2})');
        ylabel('Cumulative Probability');
    end
FDM(1:length(int),l,4,userans) = sort(DATA(1:length(int),3,l));
FDM(1:length(int),l,5,userans) = ys;

% Collect average area data and store in matrix.
av_area = transpose(cell2mat(struct2cell(areas)))./(sizeconvo^2);

av_area2 = mean(av_area);
ste_area = std(av_area)/sqrt(length(av_area));
Data(l,:) = [int2 intstd length(int) av_area2 ste_area];

X(1:length(av_area),:,l) = av_area;
Y(1:length(int),:,l) = int;
Z(1:length(X),1,l,userans) = X(:,1,l);
Z(1:length(Y),2,l,userans) = Y(:,1,l);
%checkstatus
% Update plots
%if or(checkstatus==0, t3dilate==0)
X2 = X(:,:,l);
X2(X2==0) = [];

areas_orig(1:length(X2),l,userans) = X2;
axes(handles.cumulative_plot);

% Display histogram of areas in GUI.
    if length(X2)<2
        % skip the fit
        h = histogram(X2);
        h(1).FaceColor = [0.8 0 0];
    else
        h = histfit(X2,20,'gamma');
        h(1).FaceColor = [.8 0 0]; h(2).Color = [.3 .3 .3];
    end
xlabel('Puncta area (\mum^{2})');
ylabel('Counts');
%end
set(handles.intensity_graph,'UserData',Z);

hold on; % crucial hold on statement!

% Shows original grayscale image
I2 = zeros(size(i2,1),size(i2,2),3);
if isa(i1,'uint8') 
    I3 = uint8(I2);
else
    if isa(i1,'uint16') 
        I3 = uint16(I2);
    end
end

% If correlation channel to be shown, the brightness is set to 0.5 of
% original brightness, so that puncta overlap can be seen.
if get(handles.showcorr,'Value')==1
    MAP2_brightness_coefficient = 0.5;
else
    MAP2_brightness_coefficient = 0;
end

% Prepare a hybrid of original image and all traces (puncta, map2, and
% soma).

if doMaP2 == 1
    I3(:,:,1) = i1(:,:,syn_c)+i1(:,:,channel)*MAP2_brightness_coefficient;
    I3(:,:,2) = i1(:,:,syn_c)+i1(:,:,channel)*MAP2_brightness_coefficient;
    I3(:,:,3) = i1(:,:,syn_c)+i1(:,:,channel)*MAP2_brightness_coefficient;
else
    if get(handles.obj_quant,'Value')==3
        I3(:,:,1)=5.*(i1(:,:,syn_c));
        I3(:,:,2)=5.*(i1(:,:,syn_c));
        I3(:,:,3)=5.*(i1(:,:,syn_c));
    else
        I3(:,:,1) = i1(:,:,syn_c);
        I3(:,:,2) = i1(:,:,syn_c);
        I3(:,:,3) = i1(:,:,syn_c);
    end
end

if doMaP2 == 1
        if channel == 3
        if syn_c==1
            chan2 = 2; 
        else
            chan2 = 1;
        end
    else
        if channel==1
            if syn_c==2
                chan2 = 3;
            else
                chan2 = 2;
            end
        else %channel is 2
            if syn_c==1
                chan2  = 3;
            else
                chan2 = 1;
            end
        end
        end
    if doMaP2==1
       for a = 1:size(mi8e,1)
            for b = 1:size(mi8e,2)
                  if mi8e(a,b) == 1
                      I3(a,b,channel) = maxint;
                      %I3(a,b,chan2) = 0;
                      %I3(a,b,syn_c) = 0;
                  end
            end
        end

        for aa = 1:size(mi6e,1)
            for bb = 1:size(mi6e,2)
                  if mi6e(aa,bb) == 1
                      I3(aa,bb,chan2) = maxint;
                      %I3(a,b,syn_c) = 0;
                      %I3(a,b,channel) = 0;
                  end
            end
        end
    end
% else
%     if syn_c == 1
%         chan2 = 2;
%         channel = 3;
%     else
%         if syn_c == 2
%             chan2 = 1;
%             channel = 3;
%         else
%             if syn_c == 3
%             chan2 = 1;
%             channel = 2;
%             end
%         end
%     end
end
clear a b;

    for a = 1:size(i8e,1)
        for b = 1:size(i8e,2)
              if i8e(a,b) == 1
                  if syn_c == 1
                    I3(a,b,:) = [maxint 0 0];
                  else
                      if syn_c == 2
                          I3(a,b,:) = [0 maxint 0];
                      else
                          if syn_c == 3
                              I3(a,b,:) = [0 0 maxint];
                          end
                      end
                  end
                  if doMaP2  == 1
                      I3(a,b,channel) = 0;
                      I3(a,b,chan2) = 0;
                  end
                  
              end
        end
    end


imshow(I3,'Parent',handles.frame);

% If cropped images are used, the collected images can be zero-padded for
% plotting consistency.
% Zero pad the collection matrix if necessary
if get(handles.imcollect,'Value')==1
    if size(I3,1)>size(IMcollect,1)
        IMcollect(size(IMcollect,1):size(I3,1),:,:,:) = 0;
    elseif size(I3,2)>size(IMcollect,2)
        IMcollect(size(IMcollect,2):size(I3,2),:,:,:) = 0;

    end
    if size(IMcollect,1)>size(I3,1)
        I3(size(I3,1):size(IMcollect,1))=0;
    elseif size(IMcollect,2)>size(I3,2)
        I3(size(I3,2):size(IMcollect,2))=0;
    end
    IMcollect(1:size(I3,1),1:size(I3,2),:,l,userans) = I3;
end
hold off;

% Allow zooming in GUI
h = zoom(handles.frame);
h.Motion = 'both';
h.Enable = 'on';

FDM(1,1,6,userans) = fileNum;

maxval = 1;

if l == 1
    maxval = max(max(int));
elseif max(max(int))>maxval
    maxval = max(max(int));
end
clear MIGG MIGG01 MIG MIG01
DATA_matrix(1:size(DATA,1),1:size(DATA,2),l,userans,2) = DATA(:,:,l);
cname2 = {'Number', 'Intensities', 'Areas (pixels)'};
set(handles.data_sum,'Data',DATA(:,:,l),'ColumnName',cname2);
wb_old = wb_round;
analysistime(l,1) = toc;
end % end for the initial loop, where l is the loop variable.

axes(handles.dot_plot);
hold on;
currentval = get(handles.dot_panel,'UserData');
if isempty(currentval)
    set(handles.dot_panel,'UserData',0);
    currentval = get(handles.dot_panel,'UserData');
end
if currentval<userans
     set(handles.dot_panel,'UserData',userans);
     currentval = get(handles.dot_panel,'UserData');
end
    
% Export all data to GUI tables or UserData
Intensity = mean(Data(:,1));
BigSTE = std(Data(:,1))/sqrt(fileNum);
FDM(1,l,3,userans) = Intensity;
FDM(2,l,3,userans) = BigSTE;
meanBar = linspace(userans-rangefactor,userans+rangefactor,50);
plot(meanBar,Intensity,'s','MarkerSize',5,...
    'MarkerEdgeColor','k','MarkerFaceColor','k','Parent',handles.dot_plot);
a = linspace(Intensity,Intensity+BigSTE,2);
b = linspace(Intensity,Intensity-BigSTE,2);
plot(ones(1,length(a))*userans,a,'.-k','MarkerEdgeColor','k','Parent',handles.dot_plot);
plot(ones(1,length(b))*userans,b,'.-k','MarkerEdgeColor','k','Parent',handles.dot_plot);
axis([0 currentval+1 0 maxval]);
ylim auto;
ylabel('Fluorescence (a.u.)');
set(handles.dot_plot,'xtick',0:currentval+1);
xlabel('Data Round');
hold off;
rname = {'Frame 1', 'Frame 2', 'Frame 3','Frame 4', 'Frame 5',...
    'Frame 6','Frame 7', 'Frame 8', 'Frame 9','Frame 10',...
    'Frame 11', 'Frame 12', 'Frame 13','Frame 14', 'Frame 15',...
    'Frame 16','Frame 17', 'Frame 18', 'Frame 19','Frame 20'};
set(handles.frame_select,'String',['Select frame', rname]);
roundname = {'Round 1', 'Round 2', 'Round 3','Round 4', 'Round 5',...
    'Round 6','Round 7'};
set(handles.round_popup,'String',['Select round', roundname]);
set(handles.frame_select,'Visible','Off');
cname = {'Int Mean', 'STE', 'Number', 'Avg Area (um^2)', 'Area STE'};
set(handles.text27,'UserData',filenames);
set(handles.data_gross,'Data', Data,'ColumnName',cname,'ColumnWidth',{40});

DATA_matrix(1:size(Data,1),1:size(Data,2),1,userans,1) = Data;

set(handles.uipanel5,'UserData',DATA_matrix);
if get(handles.imcollect,'Value')==1
    set(handles.figure_box,'UserData',IMcollect);
end
set(handles.area_graph,'UserData',areas_orig);
if get(handles.mapsoma,'Value')==1
    set(handles.mapsoma,'UserData',Soma_collect);
end

% Optional mask collect exported to GUI UserData
%set(handles.im_select_panel,'UserData',IMcollectMask);

set(handles.dot_plot,'UserData',FDM);
waitbar(1,hstart)
cd(get(handles.open_file,'UserData'));
close(hstart);
clear Data DATA

% Increase loop variables by 1 until conditions reached.
i_nested = i_nested+1;
    if (i_nested)>foldersloop
        break;
    end
end

% --- Executes on button press in save_button.
function save_button_Callback(hObject, eventdata, handles)
% hObject    handle to save_button (see GCBO)
% eventdata  reserved - to be defined in a future version of MATLAB
% handles    structure with handles and user data (see GUIDATA)
%uisave();
[filename, dir] = uiputfile('*.mat','Save Workspace Variables As');
newfile = fullfile(dir,filename);
FDM = get(handles.dot_plot,'UserData');
save(newfile,'FDM');
cd(dir);
Fig1 = figure;
copyobj((handles.dot_plot),Fig1);
xlabel('Data Round');
ylabel('Fluorescence Intensity (a.u.)');
hgsave(Fig1,'dot plot.fig');

Fig2 = figure;
copyobj((handles.cumulative_plot),Fig2);
if isempty(get(handles.total_round,'String'))
    xlabel('Puncta area (\mum^{2})');
    ylabel('Counts');
    hgsave(Fig2,'Histogram plot.fig');
else
    if get(handles.intensity_graph,'Value')==1
        xlabel('Fluorescence Intensity (a.u.)');
    else
        xlabel('Puncta area (\mum^{2})');
    end
    ylabel('Cumulative Distribution');
    hgsave(Fig2,'Cumulative plot.fig');
end
%hgsave(Fig1,'dot plot.fig');

Fig3 = figure;
copyobj((handles.frame),Fig3);
hgsave(Fig3,'Traces');

cd(get(handles.open_file,'UserData'));
% --- Executes on selection change in frame_select.
function frame_select_Callback(hObject, eventdata, handles)
% hObject    handle to frame_select (see GCBO)
% eventdata  reserved - to be defined in a future version of MATLAB
% handles    structure with handles and user data (see GUIDATA)

% Hints: contents = cellstr(get(hObject,'String')) returns frame_select contents as cell array
%        contents{get(hObject,'Value')} returns selected item from frame_select
if get(handles.imcollect,'Value')==1
    IMcollect = get(handles.figure_box,'UserData');
end
map_area = get(handles.map2_area,'UserData');
soma_area = get(handles.soma,'UserData');
DATA_matrix = get(handles.uipanel5,'UserData');
Z = get(handles.intensity_graph,'UserData');
%str = get(hObject,'String');
currentframe = get(hObject,'Value')-1;
roundno = get(handles.round_popup,'UserData');
switch currentframe
   case 1
       if get(handles.imcollect,'Value')==1
        i2 = IMcollect(:,:,:,1,roundno);
       end
       X = Z(:,1,1,roundno);
       data1 = DATA_matrix(:,:,1,roundno,1);
       data2 = DATA_matrix(:,:,1,roundno,2);
       if or(get(handles.map2,'Value')==1,get(handles.mapsoma,'Value')==1)
           data3 = map_area(:,:,roundno);
           data4 = soma_area(:,:,roundno);
       end
   case 2
       if get(handles.imcollect,'Value')==1
        i2 = IMcollect(:,:,:,2,roundno);
       end
       X = Z(:,1,2,roundno);
       data1 = DATA_matrix(:,:,1,roundno,1);
       data2 = DATA_matrix(:,:,2,roundno,2);
       if or(get(handles.map2,'Value')==1,get(handles.mapsoma,'Value')==1)
           data3 = map_area(:,:,roundno);
           data4 = soma_area(:,:,roundno);
       end
   case 3
       if get(handles.imcollect,'Value')==1
        i2 = IMcollect(:,:,:,3,roundno);
       end
       X = Z(:,1,3,roundno);
       data1 = DATA_matrix(:,:,1,roundno,1);
       data2 = DATA_matrix(:,:,3,roundno,2);
       if or(get(handles.map2,'Value')==1,get(handles.mapsoma,'Value')==1)
           data3 = map_area(:,:,roundno);
           data4 = soma_area(:,:,roundno);
       end
   case 4
       if get(handles.imcollect,'Value')==1
        i2 = IMcollect(:,:,:,4,roundno);
       end
       X = Z(:,1,4,roundno);
       data1 = DATA_matrix(:,:,1,roundno,1);
       data2 = DATA_matrix(:,:,4,roundno,2);
       if or(get(handles.map2,'Value')==1,get(handles.mapsoma,'Value')==1)
           data3 = map_area(:,:,roundno);
           data4 = soma_area(:,:,roundno);
       end
   case 5
       if get(handles.imcollect,'Value')==1
        i2 = IMcollect(:,:,:,5,roundno);
       end
       X = Z(:,1,5,roundno);
       data1 = DATA_matrix(:,:,1,roundno,1);
       data2 = DATA_matrix(:,:,5,roundno,2);
       if or(get(handles.map2,'Value')==1,get(handles.mapsoma,'Value')==1)
           data3 = map_area(:,:,roundno);
           data4 = soma_area(:,:,roundno);
       end
   case 6
       if get(handles.imcollect,'Value')==1
        i2 = IMcollect(:,:,:,6,roundno);
       end
       X = Z(:,1,6,roundno);
       data1 = DATA_matrix(:,:,1,roundno,1);
       data2 = DATA_matrix(:,:,6,roundno,2);
       if or(get(handles.map2,'Value')==1,get(handles.mapsoma,'Value')==1)
           data3 = map_area(:,:,roundno);
           data4 = soma_area(:,:,roundno);
       end
   case 7
       if get(handles.imcollect,'Value')==1
        i2 = IMcollect(:,:,:,7,roundno);
       end
       X = Z(:,1,7,roundno);
       data1 = DATA_matrix(:,:,1,roundno,1);
       data2 = DATA_matrix(:,:,7,roundno,2);
       if or(get(handles.map2,'Value')==1,get(handles.mapsoma,'Value')==1)
           data3 = map_area(:,:,roundno);
           data4 = soma_area(:,:,roundno);
       end
   case 8
       if get(handles.imcollect,'Value')==1
        i2 = IMcollect(:,:,:,8,roundno);
       end
       X = Z(:,1,8,roundno);
       data1 = DATA_matrix(:,:,1,roundno,1);
       data2 = DATA_matrix(:,:,8,roundno,2);
       if or(get(handles.map2,'Value')==1,get(handles.mapsoma,'Value')==1)
           data3 = map_area(:,:,roundno);
           data4 = soma_area(:,:,roundno);
       end
   case 9
       if get(handles.imcollect,'Value')==1
            i2 = IMcollect(:,:,:,9,roundno);
       end
       X = Z(:,1,9,roundno);
       data1 = DATA_matrix(:,:,1,roundno,1);
       data2 = DATA_matrix(:,:,9,roundno,2);
       if or(get(handles.map2,'Value')==1,get(handles.mapsoma,'Value')==1)
           data3 = map_area(:,:,roundno);
           data4 = soma_area(:,:,roundno);
       end
   case 10
       if get(handles.imcollect,'Value')==1
            i2 = IMcollect(:,:,:,10,roundno);
       end
       X = Z(:,1,10,roundno);
       data1 = DATA_matrix(:,:,1,roundno,1);
       data2 = DATA_matrix(:,:,10,roundno,2);
       if or(get(handles.map2,'Value')==1,get(handles.mapsoma,'Value')==1)
           data3 = map_area(:,:,roundno);
           data4 = soma_area(:,:,roundno);
       end
   case 11
       if get(handles.imcollect,'Value')==1
        i2 = IMcollect(:,:,:,11,roundno);
       end
       X = Z(:,1,11,roundno);
       data1 = DATA_matrix(:,:,1,roundno,1);
       data2 = DATA_matrix(:,:,11,roundno,2);
       if or(get(handles.map2,'Value')==1,get(handles.mapsoma,'Value')==1)
           data3 = map_area(:,:,roundno);
           data4 = soma_area(:,:,roundno);
       end
   case 12
       if get(handles.imcollect,'Value')==1
        i2 = IMcollect(:,:,:,12,roundno);
       end
       X = Z(:,1,12,roundno);
       data1 = DATA_matrix(:,:,1,roundno,1);
       data2 = DATA_matrix(:,:,12,roundno,2);
       if or(get(handles.map2,'Value')==1,get(handles.mapsoma,'Value')==1)
           data3 = map_area(:,:,roundno);
           data4 = soma_area(:,:,roundno);
       end
   case 13
       if get(handles.imcollect,'Value')==1
        i2 = IMcollect(:,:,:,13,roundno);
       end
       X = Z(:,1,13,roundno);
       data1 = DATA_matrix(:,:,1,roundno,1);
       data2 = DATA_matrix(:,:,13,roundno,2);
       if or(get(handles.map2,'Value')==1,get(handles.mapsoma,'Value')==1)
           data3 = map_area(:,:,roundno);
           data4 = soma_area(:,:,roundno);
       end
   case 14
       if get(handles.imcollect,'Value')==1
        i2 = IMcollect(:,:,:,14,roundno);
       end
       X = Z(:,1,14,roundno);
       data1 = DATA_matrix(:,:,1,roundno,1);
       data2 = DATA_matrix(:,:,14,roundno,2);
       if or(get(handles.map2,'Value')==1,get(handles.mapsoma,'Value')==1)
           data3 = map_area(:,:,roundno);
           data4 = soma_area(:,:,roundno);
       end
   case 15
       if get(handles.imcollect,'Value')==1
        i2 = IMcollect(:,:,:,15,roundno);
       end
       X = Z(:,1,15,roundno);
       data1 = DATA_matrix(:,:,1,roundno,1);
       data2 = DATA_matrix(:,:,15,roundno,2);
       if or(get(handles.map2,'Value')==1,get(handles.mapsoma,'Value')==1)
           data3 = map_area(:,:,roundno);
           data4 = soma_area(:,:,roundno);
       end
   case 16
       if get(handles.imcollect,'Value')==1
        i2 = IMcollect(:,:,:,16,roundno);
       end
       X = Z(:,1,16,roundno);
       data1 = DATA_matrix(:,:,1,roundno,1);
       data2 = DATA_matrix(:,:,16,roundno,2);
       if or(get(handles.map2,'Value')==1,get(handles.mapsoma,'Value')==1)
           data3 = map_area(:,:,roundno);
           data4 = soma_area(:,:,roundno);
       end
   case 17
       if get(handles.imcollect,'Value')==1
        i2 = IMcollect(:,:,:,17,roundno);
       end
       X = Z(:,1,17,roundno);
       data1 = DATA_matrix(:,:,1,roundno,1);
       data2 = DATA_matrix(:,:,17,roundno,2);
       if or(get(handles.map2,'Value')==1,get(handles.mapsoma,'Value')==1)
           data3 = map_area(:,:,roundno);
           data4 = soma_area(:,:,roundno);
       end
   case 18
       if get(handles.imcollect,'Value')==1
        i2 = IMcollect(:,:,:,18,roundno);
       end
       X = Z(:,1,18,roundno);
       data1 = DATA_matrix(:,:,1,roundno,1);
       data2 = DATA_matrix(:,:,18,roundno,2);
       if or(get(handles.map2,'Value')==1,get(handles.mapsoma,'Value')==1)
           data3 = map_area(:,:,roundno);
           data4 = soma_area(:,:,roundno);
       end
   case 19
       if get(handles.imcollect,'Value')==1
            i2 = IMcollect(:,:,:,19,roundno);
       end
       X = Z(:,1,19,roundno);
       data1 = DATA_matrix(:,:,1,roundno,1);
       data2 = DATA_matrix(:,:,19,roundno,2);
       if or(get(handles.map2,'Value')==1,get(handles.mapsoma,'Value')==1)
           data3 = map_area(:,:,roundno);
           data4 = soma_area(:,:,roundno);
       end
   case 20
       if get(handles.imcollect,'Value')==1
            i2 = IMcollect(:,:,:,20,roundno);
       end
       X = Z(:,1,20,roundno);
       data1 = DATA_matrix(:,:,1,roundno,1);
       data2 = DATA_matrix(:,:,20,roundno,2);
       if or(get(handles.map2,'Value')==1,get(handles.mapsoma,'Value')==1)
           data3 = map_area(:,:,roundno);
           data4 = soma_area(:,:,roundno);
       end
       
end
%size(i2)
%figure, imshow(i2);

if get(handles.imcollect,'Value')==0
    pixnum2 = get(handles.resolution,'Value');
    if pixnum2 == 1
        pixnum = 1024; % default if nothing is selected
    else
        if pixnum2 == 2
            pixnum = 256;
        else
            if pixnum2 == 3
                pixnum = 512;
            else 
                if pixnum2 == 4
                    pixnum = 1024;
                else
                    if pixnum2 == 5
                        pixnum = 2048;
                    else
                        pixnum = get(handles.resolution,'UserData');
                    end
                end
            end
        end
    end
    i2 = zeros(pixnum,pixnum,3);
end
    

X2 = X(:,1);
X2(X2==0) = [];

I2 = zeros(size(i2,1),size(i2,2),3);
if max(max(max(i2)))>256
    I3 = uint16(I2);
else
    I3 = uint8(I2); %size(I3)
end
I3(:,:,1) = i2(:,:,1);
I3(:,:,2) = i2(:,:,2);
I3(:,:,3) = i2(:,:,3);
% Shows original grayscale image
axes(handles.frame);
cla;
imshow(I3,'Parent',handles.frame);
%hold on;
%red = cat(3,ones(size(i2)),zeros(size(i2)),zeros(size(i2)));
%green = cat(3,zeros(size(i6)),ones(size(i6)),zeros(size(i6)));
%blue = cat(3,zeros(size(i2)),zeros(size(i2)),ones(size(i2)));
% Overlay with all red image
%h = imshow(red,'Parent',handles.frame); % set as h to adjust image AlphaData

% Change AlphaData with respect to binary image i6e.
%set(h,'AlphaData',i8e);
%hold off;

%title(['Frame ',num2str(currentframe)]);
hold off;

h = zoom(handles.frame);
h.Motion = 'both';
h.Enable = 'on';

set(handles.data_gross,'Data',data1);
set(handles.data_sum,'Data',data2);
if or(get(handles.map2,'Value')==1,get(handles.mapsoma,'Value')==1)
    set(handles.map2_area,'Data',data3);
    set(handles.soma,'Data',data4);
end
axes(handles.cumulative_plot);
cla;
h = histfit(X2,20,'gamma');

h(1).FaceColor = [.8 0 0]; h(2).Color = [.3 .3 .3];
xlabel('Puncta area (\mum^{2})');
ylabel('Counts');


% --- Executes during object creation, after setting all properties.
function frame_select_CreateFcn(hObject, eventdata, handles)
% hObject    handle to frame_select (see GCBO)
% eventdata  reserved - to be defined in a future version of MATLAB
% handles    empty - handles not created until after all CreateFcns called

% Hint: popupmenu controls usually have a white background on Windows.
%       See ISPC and COMPUTER.
if ispc && isequal(get(hObject,'BackgroundColor'), get(0,'defaultUicontrolBackgroundColor'))
    set(hObject,'BackgroundColor','white');
end


function open_file_Callback(hObject, eventdata, handles)
% hObject    handle to open_file (see GCBO)
% eventdata  reserved - to be defined in a future version of MATLAB
% handles    structure with handles and user data (see GUIDATA)

% Hints: get(hObject,'String') returns contents of open_file as text
%        str2double(get(hObject,'String')) returns contents of open_file as a double


% --- Executes during object creation, after setting all properties.
function open_file_CreateFcn(hObject, eventdata, handles)
% hObject    handle to open_file (see GCBO)
% eventdata  reserved - to be defined in a future version of MATLAB
% handles    empty - handles not created until after all CreateFcns called

% Hint: edit controls usually have a white background on Windows.
%       See ISPC and COMPUTER.
if ispc && isequal(get(hObject,'BackgroundColor'), get(0,'defaultUicontrolBackgroundColor'))
    set(hObject,'BackgroundColor','white');
end


function data_round_Callback(hObject, eventdata, handles)
% hObject    handle to data_round (see GCBO)
% eventdata  reserved - to be defined in a future version of MATLAB
% handles    structure with handles and user data (see GUIDATA)

% Hints: get(hObject,'String') returns contents of data_round as text
%        str2double(get(hObject,'String')) returns contents of data_round as a double
roundNo = str2double(get(hObject,'String'));
set(hObject,'UserData',roundNo);


% --- Executes during object creation, after setting all properties.
function data_round_CreateFcn(hObject, eventdata, handles)
% hObject    handle to data_round (see GCBO)
% eventdata  reserved - to be defined in a future version of MATLAB
% handles    empty - handles not created until after all CreateFcns called

% Hint: edit controls usually have a white background on Windows.
%       See ISPC and COMPUTER.
if ispc && isequal(get(hObject,'BackgroundColor'), get(0,'defaultUicontrolBackgroundColor'))
    set(hObject,'BackgroundColor','white');
end


% --- Executes on button press in watershed.
function watershed_Callback(hObject, eventdata, handles)
% hObject    handle to watershed (see GCBO)
% eventdata  reserved - to be defined in a future version of MATLAB
% handles    structure with handles and user data (see GUIDATA)

% Hint: get(hObject,'Value') returns toggle state of watershed
if get(hObject,'Value')==get(hObject,'Max')
    %display('Selected');
    doWatershed = 1;
    set(hObject,'UserData',doWatershed);
else
    %display('Not selected');
    doWatershed = 0;
    set(hObject,'UserData',doWatershed);
end


% --- Executes on button press in intensity_graph.
function intensity_graph_Callback(hObject, eventdata, handles)
% hObject    handle to intensity_graph (see GCBO)
% eventdata  reserved - to be defined in a future version of MATLAB
% handles    structure with handles and user data (see GUIDATA)

% Hint: get(hObject,'Value') returns toggle state of intensity_graph
if get(hObject,'Value')==1
    set(handles.area_graph,'Value',0);
    set(handles.number_graph,'Value',0);
    set(handles.dot_opt,'Enable','On');
    set(handles.box_opt,'Enable','On');
end

% --- Executes on button press in area_graph.
function area_graph_Callback(hObject, eventdata, handles)
% hObject    handle to area_graph (see GCBO)
% eventdata  reserved - to be defined in a future version of MATLAB
% handles    structure with handles and user data (see GUIDATA)

% Hint: get(hObject,'Value') returns toggle state of area_graph
if get(hObject,'Value')==1
    set(handles.number_graph,'Value',0);
    set(handles.intensity_graph,'Value',0);
    set(handles.dot_opt,'Enable','On');
    set(handles.box_opt,'Enable','On');
end

% --- Executes on button press in plot_all.
function plot_all_Callback(hObject, eventdata, handles)
% hObject    handle to plot_all (see GCBO)
% eventdata  reserved - to be defined in a future version of MATLAB
% handles    structure with handles and user data (see GUIDATA)
colors = {'r','b','g',[0 .7 .7],[1 0.5 0.5],[0 .7 0],[0.7 0.7 0.7], [0.5 0.5 0.5]};
rounds = get(handles.total_round,'String');
Data = get(handles.uipanel5,'UserData');
clear mint mint3
if get(handles.folder_n,'Value')==1
    rounds = str2double(rounds);
else
    if isempty(rounds)
        prompt = 'Enter total number of rounds ';
        rounds = inputdlg(prompt,'Enter round number');
        set(handles.total_round,'String',rounds);
        rounds = str2double(cell2mat(rounds));
    else
        rounds = str2double(rounds);
    end
end

set(handles.anova,'UserData',rounds);
FDM = get(handles.dot_plot,'UserData');
Z = get(handles.intensity_graph,'UserData');
areas = get(handles.area_graph,'UserData');
map2 = get(handles.map2_area,'UserData');
somata = get(handles.mapsoma,'UserData');
DATA_matrix = get(handles.uipanel5,'UserData');
if get(handles.number_graph,'Value')==1
    axes(handles.dot_plot);
    Numbox =  zeros(200,8);
    Xboxn = zeros(200,8);
    cla;
    hold on;
    for ii = 1:rounds
        fileNum = FDM(1,1,6,ii);
        data1 = DATA_matrix(:,:,1,ii,1);
        for rnum = 1:fileNum
            
            num = data1(rnum,3);
            if and(rnum==1,ii==1)
                loop_count = 1;
            else
                loop_count = loop_count+1;
            end
            %num =FDM(:,rnum,1,ii);
            %num(num==0)=[];
            %num = length(num);
            %num
            %map2
            if isempty(map2)
                % do not divide
            else
                if get(handles.mapsoma,'Value')==1
                    Soma = somata(rnum,:,ii);
                    Soma(Soma==0)=[];
                    Soma = sum(Soma);
                    num = num/(Soma+map2(rnum,1,ii));
                else
                    num = num/map2(rnum,1,ii);
                end
            end
            %map2(rnum,1,ii)
            totnum(rnum,ii) = num;
            
            yboxn = FDM(:,rnum,2,ii);
            yboxn(yboxn==0)=[];
            yboxn = length(yboxn);
            xboxn = ones(size(yboxn,1),1).*ii;
%             if and(rnum  == 1,ii==1)
%                 z_sizen = 1;
%             else
%                 z_sizen = length(zboxn);
%             end
            zboxn(loop_count,1) = xboxn;
            zboxn(loop_count,2) = yboxn;
            %zboxn
        end
        
        if size(totnum,1)<=fileNum
            numRound = totnum(:,ii);
        else
            numRound = totnum(:,ii);
            numRound(fileNum+1:end)=NaN;
        end
        Numbox(1:size(numRound,1),ii) = numRound;
        Numbox(fileNum+1:end,ii) = NaN;
        Xboxn(1:size(numRound,1),ii) = ones(size(numRound,1),1)*ii;
        Xboxn(fileNum+1:end,ii) = NaN;
%             numRound
%             fileNum
%         end
        %numRound
        sten = nanstd(numRound)/sqrt(fileNum);
        Numavg = nanmean(numRound);
            if get(handles.bar_opt,'Value')==1
                bar(ii, Numavg,'FaceColor',colors{ii});
                errorbar(ii,Numavg,0,sten,'.k','LineWidth',1);
                if isempty(map2)
                    ylabel('Puncta number');
                else
                    ylabel('Puncta number/MAP2 area');
                end
            end
    end
    if rounds<8
        Numbox(:,rounds+1:end) = NaN;
        Xboxn(:,rounds+1:end) = NaN;
    end
    %Numbox
    if get(handles.box_opt,'Value')==1
            figure, boxplot(Numbox,'Notch','on');%boxplot(zboxn(:,2), zboxn(:,1),'Notch','on');
            xlabel('Data Round');
            if or(get(handles.map2,'Value')==1, get(handles.mapsoma,'Value')==1)
                ylabel('Puncta Number/MAP2 Area');
            else
                ylabel('Puncta Number');
            end
    end
    set(handles.box_opt,'UserData',totnum);
    axis auto;
    hold off;
else
%max(areas)
% axes(handles.dot_plot);
% cla;
% hold on;
% for i = 1:rounds % different rounds
%     %size(FDM)
%     fileNum = FDM(1,1,6,i);
%     for r = 1:fileNum % frame within same round (equivalent to l)
%         x = FDM(:,:,1,i);
%         y = FDM(:,:,2,i);
%         x(x==0) = [];
%         y(y==0) = [];
%         plot(x,y,'o','MarkerEdgeColor',colors{i},'Parent',handles.dot_plot);
%     end
%     x2 = linspace(-0.4+i,0.4+i,50);
%     y2 = ones(1,50)*FDM(1,r,3,i);
%     plot(x2,y2,'s','MarkerSize',5,'MarkerEdgeColor','k','MarkerFaceColor','k');
%     stebar = [FDM(1,r,3,i)-FDM(2,r,3,i),FDM(1,r,3,i)+FDM(2,r,3,i)];
%     plot(ones(1,2)*i,stebar,'.-k','MarkerEdgeColor','k');
% end
% hold off;
% 
% clear i r x y;
Intbox =  zeros(200,8);
Xbox = zeros(200,8);
% axes(handles.cumulative_plot);
% cla;
hold on;
if get(handles.intensity_graph,'Value')==1
    axes(handles.dot_plot);
    cla;
    hold on;
    for i = 1:rounds % different rounds
        %size(FDM)
        data2 = DATA_matrix(:,:,1,i,1);
        fileNum = FDM(1,1,6,i);
        %FDM(:,:,2,i)
        Intbox(1:size(data2,1),i) = data2(:,1);
        Intbox(fileNum+1:end,i) = NaN;
        Xbox(1:size(data2,1),i) = ones(size(data2,1),1);
        Xbox(fileNum+1:end,i) = NaN;
        
        y = FDM(:,:,2,i);
        %yold = y
        y(y==0)=NaN;
        avgY = nanmean(y);
        stdY = nanstd(avgY);
        avgY = nanmean(avgY);
        %xvals = zeros(size(y,1),size(y,2));
%         d = zeros(size(y,1),size(y,2));
%         category = d;
%         rangefactor = 0.3;
%     for p2 = 1:size(y,2) % images
%         y(y==0) = NaN;
%         for p = 1:size(y,1) % data points
%                 if isnan(y(p,p2))
%                     %break;
%                 elseif and(y(p,p2)<(avgY+3*stdY),y(p,p2)>(avgY-3*stdY))
%                     %nanstd(y(:,p2))
%                     d(p,p2) = abs(avgY-y(p,p2));
%                     range = 10/d(p,p2)*2;
%                     range(range>rangefactor) = rangefactor;
%                     xvals(p,p2) = (i+(-range+(range--range).*rand(1,1)));
%                     category(p,p2) = 1;
%                 else
%                     d(p,p2) = abs(avgY-y(p,p2));
%                     range = 5/d(p,p2);
%                     range(range>rangefactor) = rangefactor;
%                     xvals(p,p2) = (i+(-range+(range--range).*rand(1,1)));
%                     category(p,p2) = 2;
%                 end
%                 
%                 if p<5
%                 %[y(p,p2), abs(y(p,p2)-avgY),d(p,p2),xvals(p,p2), category(p,p2)]
%                 end
%         end
%     end

         
                % Remove zeros
        %x(x==0) =NaN;
        %y(y==0) = [];            
        y(isnan(y))=[];
        %x(isnan(x))=[];
        %size(y)
        x = i*ones(size(y,1),size(y,2));%(xvals);
        %size(x)
        if get(handles.dot_opt,'Value')==1
            %for u = 1:size(y,1)
                %figure;
                %yj = ones(size(y,1), size(y,2));
                scatter(x,y,'jitter','on','jitterAmount',0.3,'MarkerEdgeColor',colors{i},'Parent',handles.dot_plot);
                
                %plot(x,y,'o','MarkerEdgeColor',colors{i},'Parent',handles.dot_plot);
                axis auto;
            %end
        end
        
        for r = 1:fileNum % frame within same round (equivalent to l)
            yboxi = data2(r,1);%FDM(:,r,2,i);

            mint3 = data2(r,1); % for one image only
            mint3(fileNum+1:end)=[];
            num = length(mint3); % number of puncta in the image
            if size(mint3,1)<=num
                mint(r,i) = mean(mint3);
            else
                mint3(num+1:end)=NaN;
                mint(r,i) = nanmean(mint3);
            end
%             if i== 1
%                 mint3
%             end
        end
        x2 = linspace(-0.3+i,0.3+i,50);
        
        y2 = ones(1,50)*FDM(1,r,3,i);
        if get(handles.dot_opt,'Value')==1
            plot(x2,y2,'s','MarkerSize',5,'MarkerEdgeColor','k','MarkerFaceColor','k');
            stebar = [FDM(1,r,3,i)-FDM(2,r,3,i),FDM(1,r,3,i)+FDM(2,r,3,i)];
            plot(ones(1,2)*i,stebar,'.-k','MarkerEdgeColor','k');
        end
        %mint
        Mint = mint(:,i);
        Mint(Mint==0)=NaN;
        mint2 = nanmean(Mint);
        stem = nanstd(Mint)/sqrt(fileNum);
        if get(handles.bar_opt,'Value')==1
            bar(i, mint2,'FaceColor',colors{i});
            errorbar(i,mint2,0,stem,'.k');
        end
            ylabel('Fluorescence Intensity (a.u.)');
        clear mint3 num
    end
    set(handles.dot_opt,'UserData',mint);

    hold off;

    clear i r x y;
    axes(handles.cumulative_plot);
    cla;
    hold on;
    for i = 1:rounds % different rounds
        fileNum = FDM(1,1,6,i);
        for r = 1:fileNum % frame within same round (equivalent to l)
            Y = Z(:,2,r,i);
            Y2 = Y;
            Y2(Y2==0)=[];
            Y2 = sort(Y2);
            X2 = linspace(0,1,length(Y2));
%             x = FDM(:,r,4,i);
%             y = FDM(:,r,5,i);
%             x(x==0) = [];
%             y(y==0) = [];
            %plot(x,y*get(handles.imsize,'UserData'),'-','Color',colors{i},'Parent',handles.cumulative_plot);
            plot(Y2,X2,'-','Color',colors{i});
        end
        xlabel('Fluorescence (a.u.)');
        ylabel('Cumulative Probability');
        
    end
    Intbox(:,rounds+1:end) = NaN;
    %Intbox
    if get(handles.box_opt,'Value')==1
            %figure, boxplot(zboxi(:,2), zboxi(:,1),'Notch','on');
            figure, boxplot(Intbox,'Notch','on');
            xlabel('Data Round');
            ylabel('Fluorescence Intensity (a.u.)');
    end
    hold off;
else % if area is selected...
    clear i r;
    
    axes(handles.dot_plot);
    cla;
    hold on;
    
    fileNum1 = FDM(1,1,6,1);
    areastots = zeros(fileNum1,rounds);
    
    Areabox = zeros(200,8);
    Xboxa = zeros(200,8);
    
    for i3 = 1:rounds % different rounds
        
        fileNum = FDM(1,1,6,i3);
        %zbox = ones(1,2)
        data3 = DATA_matrix(:,:,1,i3,1);
        Areabox(1:size(data3,1),i3) = data3(:,4);
        Areabox(fileNum+1:end,i3) = NaN;
        Xboxa(1:size(data3,1),i3) = ones(size(data3,1),1);
        Xboxa(fileNum+1:end,i3) = NaN;
        
        for r = 1:fileNum % frame within same round (equivalent to l)
            x = FDM(:,:,1,i3);
            xr = FDM(:,r,1,i3);
            y = FDM(:,:,5,i3);
            ybox = areas(:,r,i3);
            if i3==1
            r ;
            i3;
            end
            ydot = areas(:,r,i3);
            xr(xr==0)=[];
            
            if i3==1
                ydot(size(xr,1)+1:end)=[];
            else
                ydot(size(xr,1)+1:end)=[];
            end
            xr2 = i3.*ones(size(ydot,1),size(ydot,2));
            %ydot(ydot==0)=[];
            %ybox(:,1,1)
            ybox(size(xr,1)+1:end)=[];
            %ybox(ybox==0)=[];
            %ydot
            xbox = ones(size(ybox,1),1).*i3;
            if and(r == 1,i3==1)
                z_size = 1;
            else
                z_size = length(zbox);
            end
            %size(xbox)

            zbox(z_size:z_size+length(xbox)-1,1) = i3;
            zbox(z_size:z_size+length(ybox)-1,2) = ybox;

            x(x==0) = [];
            y(y==0) = [];
            
            y0 = ybox;
            m_y1(r) = mean(y0);
            if get(handles.dot_opt,'Value')==1
                scatter(xr2,ydot,'jitter','on','jitterAmount',0.3,'MarkerEdgeColor',colors{i3},'Parent',handles.dot_plot);
                axis([0 rounds+1 0 7]);
            end
        end
        

        %m_y2 = nanmean(m_y1);
        areaRound = data3(:,4);%m_y1;
        % if the filenumbers aren't equal, then overwrite extra old values
        % with NaNs

        areaRound(1+fileNum:end) = NaN;
        %areaRound

        m_y2 = nanmean(areaRound);
        %m_y22 = data3(r,4);
        %size(m_y1)
        if length(m_y1)>size(areastots,1)
            as2 = zeros(length(m_y1),size(areastots,2));
            as2(1:size(areastots,1),1:size(areastots,2)) = areastots;
            areastots = as2;
        end
        areastots(1:size(data3,1),i3) = data3(:,4);%m_y1;
%         x2 = linspace(-0.4+i,0.4+i,50);
%         y2 = ones(1,50)*m_y2;
        stey = nanstd(areaRound)/sqrt(fileNum);
%         plot(x2,y2,'s','MarkerSize',5,'MarkerEdgeColor','k','MarkerFaceColor','k');
%         stebar = [m_y2-stey,m_y2+stey];
%         plot(ones(1,2)*i,stebar,'.-k','MarkerEdgeColor','k');
        x3 = linspace(-0.3+i3,0.3+i3,50);
        y3 = linspace(m_y2,m_y2,50);
        stey2 = [m_y2-stey m_y2+stey];
         if get(handles.dot_opt,'Value')==1
            plot(x3,y3,'s','MarkerSize',5,'MarkerEdgeColor','k','MarkerFaceColor','k');        
            plot(ones(1,2)*i3,stey2,'.-k','MarkerEdgeColor','k');
            ylabel('Area (\mum^{2})');
         end
        
        
         
        if get(handles.bar_opt,'Value')==1
            bar(i3, m_y2,'FaceColor',colors{i3});
            errorbar(i3,m_y2,0,stey,'.k');
            ylabel('Area (\mum^{2})');
        end
        %clear m_y1
    end

    areastots(areastots==0) = NaN;
    
    hold off;
    set(handles.bar_opt,'UserData',areastots);
    clear i r x y;
    axes(handles.cumulative_plot);
    cla;
    hold on;
        for i2 = 1:rounds % different rounds
        fileNum = FDM(1,1,6,i2);
            for r = 1:fileNum % frame within same round (equivalent to l)
                y = Z(:,1,r,i2);
                y2 = y;
                y2(y2==0)=[];
                y2 = sort(y2);
                x2 = linspace(0,1,length(y2));
                plot(y2,x2,'-','Color',colors{i2});
                
%                 axes(handles.dot_plot);
%                 cla;
%                 FDMx = FDM(:,r,1,i2);
%                 FDMy = y;
%                 for q = 1:length(y)
%                     if FDMy(q) == 0
%                         FDMx(q) = 0;
%                         %q
%                     end
%                 end
% 
%                 FDMx(FDMx==0) = [];
%                 FDMy(FDMy==0) = [];
% 
% 
%                 plot(FDMx,FDMy,'o','MarkerEdgeColor',colors{i2},'Parent',handles.dot_plot);

            end
        xlabel('Area (\mum^{2})');
        ylabel('Cumulative Probability');
        end
        Areabox(:,rounds+1:end) = NaN;
    if get(handles.box_opt,'Value')==1
        %zbox
        figure, boxplot(Areabox,'Notch','on');%zbox(:,2), zbox(:,1),'Notch','on');
        xlabel('Data Round');
        ylabel('Area (\mum^{2})');
    end
    hold off;
    clear i3;
end
end
    axis auto;


function edit6_Callback(hObject, eventdata, handles)
% hObject    handle to edit6 (see GCBO)
% eventdata  reserved - to be defined in a future version of MATLAB
% handles    structure with handles and user data (see GUIDATA)

% Hints: get(hObject,'String') returns contents of edit6 as text
%        str2double(get(hObject,'String')) returns contents of edit6 as a double
imsize = get(hObject,'String');
if isempty(imsize)
    prompt = 'Need to enter image size! ';
    imsize = str2double(cell2mat(inputdlg(prompt,'Enter round number')));
else
end
set(hObject,'UserData',imsize);
    

% --- Executes during object creation, after setting all properties.
function edit6_CreateFcn(hObject, eventdata, handles)
% hObject    handle to edit6 (see GCBO)
% eventdata  reserved - to be defined in a future version of MATLAB
% handles    empty - handles not created until after all CreateFcns called

% Hint: edit controls usually have a white background on Windows.
%       See ISPC and COMPUTER.
if ispc && isequal(get(hObject,'BackgroundColor'), get(0,'defaultUicontrolBackgroundColor'))
    set(hObject,'BackgroundColor','white');
end


% --- Executes on button press in anova.
function anova_Callback(hObject, eventdata, handles)
% hObject    handle to anova (see GCBO)
% eventdata  reserved - to be defined in a future version of MATLAB
% handles    structure with handles and user data (see GUIDATA)

% Hint: get(hObject,'Value') returns toggle state of anova
val = get(hObject,'Value');
if val ==1
    set(handles.ttest,'Value',0);
end

% --- Executes on button press in runstats.
function runstats_Callback(hObject, eventdata, handles)
% hObject    handle to runstats (see GCBO)
% eventdata  reserved - to be defined in a future version of MATLAB
% handles    structure with handles and user data (see GUIDATA)
an = get(handles.anova,'Value');
tt = get(handles.ttest,'Value');
KS = get(handles.KStest,'Value');
FDM = get(handles.dot_plot,'UserData');
imsize = str2double(get(handles.edit6,'String'));
pixnum2 = get(handles.resolution,'Value');
if pixnum2 == 1
    pixnum = 1024; % default if nothing is selected
else
    if pixnum2 == 2
        pixnum = 256;
    else
        if pixnum2 == 3
            pixnum = 512;
        else 
            if pixnum2 == 4
                pixnum = 1024;
            else
                if pixnum2 == 5
                    pixnum = 2048;
                else
                    pixnum = get(handles.resolution,'UserData');
                end
            end
        end
    end
end

size_convo = pixnum/imsize;

if an ==1
    val = 1;
else
    if tt ==1
        val = 2;
    else
        if KS==1
            val = 3;
        end
    end
end


switch val
    case 1
        if isempty(str2double(get(handles.total_round,'String')))
            rounds = get(handles.anova,'UserData');
        else
            rounds = str2double(get(handles.total_round,'String'));
        end
        fileNum1 = FDM(1,1,6,1);
        Y = zeros(fileNum1,rounds);
        for i = 1:rounds
            fileNum = FDM(1,1,6,i);
            MX = zeros(1,fileNum); %mean data for each image
            for r = 1:fileNum
                if get(handles.intensity_graph,'Value')==1
                    x2 = get(handles.dot_opt,'UserData');
                else 
                    if get(handles.area_graph,'Value') == 1
                        x2 = get(handles.bar_opt,'UserData');
                    else
                        x2 = get(handles.box_opt,'UserData');
                    end
                end
                
                x = x2(r,i);
                x(x==0)=[];
                mx = mean(x);
                MX(1,r) = mx;
            end
            if length(MX)>size(Y,1)
                Yy = zeros(length(MX),rounds);
                Yy(1:size(Y,1),1:size(Y,2)) = Y;
                Y = Yy;
            end
            Y(1:size(MX,2),i) = MX;
        end
        Y(Y==0) = NaN;
        [p,tbl,statistics] = anova1(Y,[],'off');
        set(handles.anova_table,'Data',tbl,'ColumnWidth',{50});
        set(handles.pvalue,'String',num2str(p));
        h = figure;
        [vals1,vals2] = multcompare(statistics);

        col_header = {'Group 1','Group 2','Lower Int Limit', 'Means Difference', 'Upper Int Limit', 'P values'};
        tab = figure; uitable(tab,'Data',vals1,'ColumnName',col_header,'Position',[20 120 520 200]);
    case 2
        fileNum = FDM(1,1,6,1);
        x = zeros(fileNum,2);
        %rounds = get(handles.anova,'UserData');
        for i = 1:2 % only two for t-test
            fileNum = FDM(1,1,6,i);
            MX = zeros(1,fileNum); %mean data for each image
            %MY = zeros(1000,2);
            for r = 1:fileNum
                if get(handles.intensity_graph,'Value')==1
                    x2 = get(handles.dot_opt,'UserData');
                else 
                    if get(handles.area_graph,'Value') == 1
                        x2 = get(handles.bar_opt,'UserData');
                    else
                        if get(handles.number_graph,'Value')==1
                            x2 = get(handles.box_opt,'UserData');
                        end
                    end
                end
                %size(x2)
%                 if length(x2)>size(x,1)
%                     xy = zeros(length(x2),2);
%                     xy(1:size(x,1),1:size(x,2)) = x;
%                     x = xy;
%                 end
                x = x2(r,i);
                %x = FDM(:,r,2,i);
                x(x==0)=[];
                mx = mean(x);
                MX(1,r) = mx;
                %MY(:,i) = x;
            end
            if i==1
                Y2_1 = MX;
            else
                Y2_2 = MX;
            end
            %Y2(:,i) = MX;
        end
        
        [H,p] = ttest2(Y2_1,Y2_2);
        set(handles.pvalue,'String',num2str(p));
        
    case 3
        % For future development
%         button = questdlg('Would you like to process full data set or single frame?',...
%             'K-S Test Options',...
%             'Full set','Single frame','Single frame');
        button = 'Single frame';
        switch button
            case 'Single frame'
                prompt = {'Which image would you like to test? ','Which round of data? '} ;
                imnum1 = inputdlg(prompt,'Enter image number');
                imnum = str2double(imnum1(1));
                rounds = str2double(imnum1(2));
                Y3 = FDM(:,imnum,5,rounds);
                X3 = FDM(:,imnum,4,rounds);
                Y3(Y3==0) = [];
                X3(X3==0) = [];
            case 'Full set'
                binnum = 10;
                if isempty(str2double(get(handles.total_round,'String')))
                    rounds = get(handles.anova,'UserData');
                else
                    rounds = str2double(get(handles.total_round,'String'));
                end
                for q = 1:rounds
                    X3_11 = FDM(:,:,4,q);
                    for w  = 1:size(X3_11,2)
                        X3_2 = FDM(:,w,4,q);
                        if w == 1   
                            X3_1 = X3_2;
                        else
                            X3_1 = vertcat(X3_1,X3_2);
                        end
                    end
                    X3_1(X3_1==0) = [];
                    X3_1 = X3_1./(size_convo)^2;
                    x01 = (X3_1(X3_1<=0.1*max(X3_1)));
                    x0 = mean(x01);
                    y0 = length(x01);
                    x11 = mean(X3_1(and(X3_1<=0.2*max(X3_1),X3_1>max(x0))));
                    x1 = mean(x11);
                    y1 = length(x11);
                    x21 = mean(X3_1(and(X3_1<=0.3*max(X3_1),X3_1>max(x1))));
                    x2 = mean(x21);
                    y2 = length(x21);
                    x31 = mean(X3_1(and(X3_1<=0.4*(max(X3_1)),X3_1>max(x2))));
                    x3 = mean(x31);
                    y3 = length(x31);
                    x41 = mean(X3_1(and(X3_1<=0.5*(max(X3_1)),X3_1>max(x3))));
                    x4 = mean(x41);
                    y4 = length(x41);
                    x51 = mean(X3_1(and(X3_1<=0.6*(max(X3_1)),X3_1>max(x4))));
                    x5 = mean(x51);
                    y5 = length(x51);
                    x61 = mean(X3_1(and(X3_1<=0.7*(max(X3_1)),X3_1>max(x5))));
                    x6 = mean(x61);
                    y6 = length(x61);
                    x71 = mean(X3_1(and(X3_1<=0.8*(max(X3_1)),X3_1>max(x6))));
                    x7 = mean(x71);
                    y7 = length(x71);
                    x81 = mean(X3_1(and(X3_1<=0.9*(max(X3_1)),X3_1>max(x7))));
                    x8 = mean(x81);
                    y8 = length(x81);
                    x91 = mean(X3_1(and(X3_1<=1.0*(max(X3_1)),X3_1>max(x8))));
                    x9 = mean(x91);
                    y9 = length(x91);
                    
                    ytotal = y0+y1+y2+y3+y4+y5+y6+y7+y8+y9;
                    
                    X3 = [x0 x1 x2 x3 x4 x5 x6 x7 x8 x9];
                    Y3 = [y0 y1 y2 y3 y4 y5 y6 y7 y8 y9];
                    Y4 = Y3./ytotal;
                    Y5 = zeros(binnum,1);
                    for q2 = 1:binnum
                        if q2 == 1
                            Y5(q2) = Y4(q2);
                        else
                            %q2
                            Y5(q2) = Y4(q2)+Y5(q2-1);
                        end
                    end
                    x3tot(:,q) = X3;
                    y5tot(:,q) = Y5;
                end   
                    figure, plot(x3tot,y5tot);
                    title('K-S Test')
                    ylabel('Cumulative Probability');
                    xlabel('Size (pixels)');               
        end
        axes(handles.cumulative_plot);
        cla;
        
        if length(X3)<30
            X3m = mean(X3);
            X3s = std(X3);
            X3ms = (X3-X3m)./X3s;
            pd = makedist('tlocationscale','mu',0,'sigma',1,'nu',1);
            [H2,p2] = kstest(X3ms,'CDF',pd);
            [f, x_vals] = ecdf(X3ms);
            hold on;
            p_1 = plot(x_vals,f);
            p_2 = plot(x_vals,normcdf(x_vals,0,1),'r');
            hold off;
            legend([p_1 p_2], 'Experimental CDF', 'Standard CDF', 'Location', 'SE');
            xlabel(' x ');
        else
            X3ms = (X3-mean(X3))./std(X3);
            [f, x_vals] = ecdf(X3ms);
            hold on;
            p_1 = plot(x_vals,f);
            %plot(X3,Y3,'k','Parent',handles.cumulative_plot);
            p_2 = plot(x_vals,normcdf(x_vals,0,1),'r');
            hold off;
            legend([p_1 p_2], 'Experimental CDF', 'Standard CDF', 'Location', 'SE');
            xlabel(' x ');
            [H2,p2] = kstest(X3ms);
        end
        set(handles.pvalue,'String',num2str(p2));
end

% --- Executes on button press in KStest.
function KStest_Callback(hObject, eventdata, handles)
% hObject    handle to KStest (see GCBO)
% eventdata  reserved - to be defined in a future version of MATLAB
% handles    structure with handles and user data (see GUIDATA)

% Hint: get(hObject,'Value') returns toggle state of KStest


% --- Executes on button press in ttest.
function ttest_Callback(hObject, eventdata, handles)
% hObject    handle to ttest (see GCBO)
% eventdata  reserved - to be defined in a future version of MATLAB
% handles    structure with handles and user data (see GUIDATA)

% Hint: get(hObject,'Value') returns toggle state of ttest
val = get(hObject,'Value');
if val ==1
    set(handles.anova,'Value',0);
end


function pvalue_Callback(hObject, eventdata, handles)
% hObject    handle to pvalue (see GCBO)
% eventdata  reserved - to be defined in a future version of MATLAB
% handles    structure with handles and user data (see GUIDATA)

% Hints: get(hObject,'String') returns contents of pvalue as text
%        str2double(get(hObject,'String')) returns contents of pvalue as a double


% --- Executes during object creation, after setting all properties.
function pvalue_CreateFcn(hObject, eventdata, handles)
% hObject    handle to pvalue (see GCBO)
% eventdata  reserved - to be defined in a future version of MATLAB
% handles    empty - handles not created until after all CreateFcns called

% Hint: edit controls usually have a white background on Windows.
%       See ISPC and COMPUTER.
if ispc && isequal(get(hObject,'BackgroundColor'), get(0,'defaultUicontrolBackgroundColor'))
    set(hObject,'BackgroundColor','white');
end


% --- Executes on selection change in round_popup.
function round_popup_Callback(hObject, eventdata, handles)
% hObject    handle to round_popup (see GCBO)
% eventdata  reserved - to be defined in a future version of MATLAB
% handles    structure with handles and user data (see GUIDATA)

% Hints: contents = cellstr(get(hObject,'String')) returns round_popup contents as cell array
%        contents{get(hObject,'Value')} returns selected item from round_popup
str = get(hObject,'String');
currentround = get(hObject,'Value')-1;
switch currentround
    case 1
        set(handles.round_popup,'UserData',1);
    case 2
        set(handles.round_popup,'UserData',2);
    case 3
        set(handles.round_popup,'UserData',3);
    case 4
        set(handles.round_popup,'UserData',4);
    case 5
        set(handles.round_popup,'UserData',5);
    case 6
        set(handles.round_popup,'UserData',6);
    case 7
        set(handles.round_popup,'UserData',7);

end
set(handles.frame_select,'Visible','On');

% --- Executes during object creation, after setting all properties.
function round_popup_CreateFcn(hObject, eventdata, handles)
% hObject    handle to round_popup (see GCBO)
% eventdata  reserved - to be defined in a future version of MATLAB
% handles    empty - handles not created until after all CreateFcns called

% Hint: popupmenu controls usually have a white background on Windows.
%       See ISPC and COMPUTER.
if ispc && isequal(get(hObject,'BackgroundColor'), get(0,'defaultUicontrolBackgroundColor'))
    set(hObject,'BackgroundColor','white');
end


% --- Executes on button press in mach_learn.
function mach_learn_Callback(hObject, eventdata, handles)
% hObject    handle to mach_learn (see GCBO)
% eventdata  reserved - to be defined in a future version of MATLAB
% handles    structure with handles and user data (see GUIDATA)

% Hint: get(hObject,'Value') returns toggle state of mach_learn
if get(hObject,'Value')==1
    set(handles.watershed,'Value',1);
    set(handles.ws_comment,'Visible','On');
end

% --- Executes on selection change in map2channel.
function map2channel_Callback(hObject, eventdata, handles)
% hObject    handle to map2channel (see GCBO)
% eventdata  reserved - to be defined in a future version of MATLAB
% handles    structure with handles and user data (see GUIDATA)

% Hints: contents = cellstr(get(hObject,'String')) returns map2channel contents as cell array
%        contents{get(hObject,'Value')} returns selected item from map2channel


% --- Executes during object creation, after setting all properties.
function map2channel_CreateFcn(hObject, eventdata, handles)
% hObject    handle to map2channel (see GCBO)
% eventdata  reserved - to be defined in a future version of MATLAB
% handles    empty - handles not created until after all CreateFcns called

% Hint: popupmenu controls usually have a white background on Windows.
%       See ISPC and COMPUTER.
if ispc && isequal(get(hObject,'BackgroundColor'), get(0,'defaultUicontrolBackgroundColor'))
    set(hObject,'BackgroundColor','white');
end


% --- Executes on button press in map2.
function map2_Callback(hObject, eventdata, handles)
% hObject    handle to map2 (see GCBO)
% eventdata  reserved - to be defined in a future version of MATLAB
% handles    structure with handles and user data (see GUIDATA)

% Hint: get(hObject,'Value') returns toggle state of map2


function t3dil_Callback(hObject, eventdata, handles)
% hObject    handle to t3dil (see GCBO)
% eventdata  reserved - to be defined in a future version of MATLAB
% handles    structure with handles and user data (see GUIDATA)

% Hints: get(hObject,'String') returns contents of t3dil as text
%        str2double(get(hObject,'String')) returns contents of t3dil as a double


% --- Executes during object creation, after setting all properties.
function t3dil_CreateFcn(hObject, eventdata, handles)
% hObject    handle to t3dil (see GCBO)
% eventdata  reserved - to be defined in a future version of MATLAB
% handles    empty - handles not created until after all CreateFcns called

% Hint: edit controls usually have a white background on Windows.
%       See ISPC and COMPUTER.
if ispc && isequal(get(hObject,'BackgroundColor'), get(0,'defaultUicontrolBackgroundColor'))
    set(hObject,'BackgroundColor','white');
end


function t2dil_Callback(hObject, eventdata, handles)
% hObject    handle to t2dil (see GCBO)
% eventdata  reserved - to be defined in a future version of MATLAB
% handles    structure with handles and user data (see GUIDATA)

% Hints: get(hObject,'String') returns contents of t2dil as text
%        str2double(get(hObject,'String')) returns contents of t2dil as a double


% --- Executes during object creation, after setting all properties.
function t2dil_CreateFcn(hObject, eventdata, handles)
% hObject    handle to t2dil (see GCBO)
% eventdata  reserved - to be defined in a future version of MATLAB
% handles    empty - handles not created until after all CreateFcns called

% Hint: edit controls usually have a white background on Windows.
%       See ISPC and COMPUTER.
if ispc && isequal(get(hObject,'BackgroundColor'), get(0,'defaultUicontrolBackgroundColor'))
    set(hObject,'BackgroundColor','white');
end


function total_round_Callback(hObject, eventdata, handles)
% hObject    handle to total_round (see GCBO)
% eventdata  reserved - to be defined in a future version of MATLAB
% handles    structure with handles and user data (see GUIDATA)

% Hints: get(hObject,'String') returns contents of total_round as text
%        str2double(get(hObject,'String')) returns contents of total_round as a double


% --- Executes during object creation, after setting all properties.
function total_round_CreateFcn(hObject, eventdata, handles)
% hObject    handle to total_round (see GCBO)
% eventdata  reserved - to be defined in a future version of MATLAB
% handles    empty - handles not created until after all CreateFcns called

% Hint: edit controls usually have a white background on Windows.
%       See ISPC and COMPUTER.
if ispc && isequal(get(hObject,'BackgroundColor'), get(0,'defaultUicontrolBackgroundColor'))
    set(hObject,'BackgroundColor','white');
end


% --- Executes on selection change in syn_chan.
function syn_chan_Callback(hObject, eventdata, handles)
% hObject    handle to syn_chan (see GCBO)
% eventdata  reserved - to be defined in a future version of MATLAB
% handles    structure with handles and user data (see GUIDATA)

% Hints: contents = cellstr(get(hObject,'String')) returns syn_chan contents as cell array
%        contents{get(hObject,'Value')} returns selected item from syn_chan


% --- Executes during object creation, after setting all properties.
function syn_chan_CreateFcn(hObject, eventdata, handles)
% hObject    handle to syn_chan (see GCBO)
% eventdata  reserved - to be defined in a future version of MATLAB
% handles    empty - handles not created until after all CreateFcns called

% Hint: popupmenu controls usually have a white background on Windows.
%       See ISPC and COMPUTER.
if ispc && isequal(get(hObject,'BackgroundColor'), get(0,'defaultUicontrolBackgroundColor'))
    set(hObject,'BackgroundColor','white');
end


% --- Executes on button press in folder_s.
function folder_s_Callback(hObject, eventdata, handles)
% hObject    handle to folder_s (see GCBO)
% eventdata  reserved - to be defined in a future version of MATLAB
% handles    structure with handles and user data (see GUIDATA)

% Hint: get(hObject,'Value') returns toggle state of folder_s
if get(hObject,'Value') == 1
    set(handles.folder_n,'Value',0);
else
    set(handles.folder_n,'Value',1);
end

% --- Executes on button press in folder_n.
function folder_n_Callback(hObject, eventdata, handles)
% hObject    handle to folder_n (see GCBO)
% eventdata  reserved - to be defined in a future version of MATLAB
% handles    structure with handles and user data (see GUIDATA)

% Hint: get(hObject,'Value') returns toggle state of folder_n
if get(hObject,'Value') == 1
    set(handles.folder_s,'Value',0);
else
    set(handles.folder_s,'Value',1);
end


% --- Executes on selection change in resolution.
function resolution_Callback(hObject, eventdata, handles)
% hObject    handle to resolution (see GCBO)
% eventdata  reserved - to be defined in a future version of MATLAB
% handles    structure with handles and user data (see GUIDATA)

% Hints: contents = cellstr(get(hObject,'String')) returns resolution contents as cell array
%        contents{get(hObject,'Value')} returns selected item from resolution


% --- Executes during object creation, after setting all properties.
function resolution_CreateFcn(hObject, eventdata, handles)
% hObject    handle to resolution (see GCBO)
% eventdata  reserved - to be defined in a future version of MATLAB
% handles    empty - handles not created until after all CreateFcns called

% Hint: popupmenu controls usually have a white background on Windows.
%       See ISPC and COMPUTER.
if ispc && isequal(get(hObject,'BackgroundColor'), get(0,'defaultUicontrolBackgroundColor'))
    set(hObject,'BackgroundColor','white');
end


% --- Executes on button press in sharpfilt.
function sharpfilt_Callback(hObject, eventdata, handles)
% hObject    handle to sharpfilt (see GCBO)
% eventdata  reserved - to be defined in a future version of MATLAB
% handles    structure with handles and user data (see GUIDATA)

% Hint: get(hObject,'Value') returns toggle state of sharpfilt


% --- Executes on button press in number_graph.
function number_graph_Callback(hObject, eventdata, handles)
% hObject    handle to number_graph (see GCBO)
% eventdata  reserved - to be defined in a future version of MATLAB
% handles    structure with handles and user data (see GUIDATA)

% Hint: get(hObject,'Value') returns toggle state of number_graph
if get(hObject,'Value')==1
    set(handles.area_graph,'Value',0);
    set(handles.intensity_graph,'Value',0);
    set(handles.dot_opt,'Value',0);
    set(handles.box_opt,'Value',0);
    set(handles.dot_opt,'Enable','Off');
    %set(handles.box_opt,'Enable','Off');
    set(handles.bar_opt,'Value',1);
end

% --- Executes on button press in dot_opt.
function dot_opt_Callback(hObject, eventdata, handles)
% hObject    handle to dot_opt (see GCBO)
% eventdata  reserved - to be defined in a future version of MATLAB
% handles    structure with handles and user data (see GUIDATA)

% Hint: get(hObject,'Value') returns toggle state of dot_opt
if get(hObject,'Value')==1
    set(handles.bar_opt,'Value',0);
    set(handles.box_opt,'Value',0);
end

% --- Executes on button press in bar_opt.
function bar_opt_Callback(hObject, eventdata, handles)
% hObject    handle to bar_opt (see GCBO)
% eventdata  reserved - to be defined in a future version of MATLAB
% handles    structure with handles and user data (see GUIDATA)

% Hint: get(hObject,'Value') returns toggle state of bar_opt
if get(hObject,'Value')==1
    set(handles.dot_opt,'Value',0);
    set(handles.box_opt,'Value',0);
end

% --- Executes on button press in box_opt.
function box_opt_Callback(hObject, eventdata, handles)
% hObject    handle to box_opt (see GCBO)
% eventdata  reserved - to be defined in a future version of MATLAB
% handles    structure with handles and user data (see GUIDATA)

% Hint: get(hObject,'Value') returns toggle state of box_opt
if get(hObject,'Value')==1
    set(handles.bar_opt,'Value',0);
    set(handles.dot_opt,'Value',0);
end


% --- Executes on button press in export.
function export_Callback(hObject, eventdata, handles)
% hObject    handle to export (see GCBO)
% eventdata  reserved - to be defined in a future version of MATLAB
% handles    structure with handles and user data (see GUIDATA)
Fig1 = figure;
copyobj((handles.dot_plot),Fig1);
xlabel('Data Round');
if get(handles.intensity_graph,'Value')==1
    ylabel('Fluorescence Intensity (a.u.)');
else
    if get(handles.area_graph,'Value')==1
        ylabel('Area (\mum^{2})');
    else
        if get(handles.map2,'Value')==0
                    ylabel('Puncta number');
        else
                    ylabel('Puncta number/MAP2 area');
        end
    end
end
hgsave(Fig1,'All Data.fig');

if get(handles.number_graph,'Value')==1
    % Do nothing
else
    Fig2 = figure;
    copyobj((handles.cumulative_plot),Fig2);
    

    if get(handles.intensity_graph,'Value')==1
        ylabel('Cumulative Probability');
        xlabel('Fluorescence Intensity (a.u.)');
    else
        ylabel('Cumulative Probability');
        xlabel('Area (\mum^{2})');
    end
    hgsave(Fig2,'Cumulative Plot.fig');
end


% --- Executes on selection change in obj_quant.
function obj_quant_Callback(hObject, eventdata, handles)
% hObject    handle to obj_quant (see GCBO)
% eventdata  reserved - to be defined in a future version of MATLAB
% handles    structure with handles and user data (see GUIDATA)

% Hints: contents = cellstr(get(hObject,'String')) returns obj_quant contents as cell array
%        contents{get(hObject,'Value')} returns selected item from obj_quant


% --- Executes during object creation, after setting all properties.
function obj_quant_CreateFcn(hObject, eventdata, handles)
% hObject    handle to obj_quant (see GCBO)
% eventdata  reserved - to be defined in a future version of MATLAB
% handles    empty - handles not created until after all CreateFcns called

% Hint: popupmenu controls usually have a white background on Windows.
%       See ISPC and COMPUTER.
if ispc && isequal(get(hObject,'BackgroundColor'), get(0,'defaultUicontrolBackgroundColor'))
    set(hObject,'BackgroundColor','white');
end


% --- Executes on button press in mapsoma.
function mapsoma_Callback(hObject, eventdata, handles)
% hObject    handle to mapsoma (see GCBO)
% eventdata  reserved - to be defined in a future version of MATLAB
% handles    structure with handles and user data (see GUIDATA)

% Hint: get(hObject,'Value') returns toggle state of mapsoma


% --- Executes on button press in showcorr.
function showcorr_Callback(hObject, eventdata, handles)
% hObject    handle to showcorr (see GCBO)
% eventdata  reserved - to be defined in a future version of MATLAB
% handles    structure with handles and user data (see GUIDATA)

% Hint: get(hObject,'Value') returns toggle state of showcorr


% --- Executes on button press in imcollect.
function imcollect_Callback(hObject, eventdata, handles)
% hObject    handle to imcollect (see GCBO)
% eventdata  reserved - to be defined in a future version of MATLAB
% handles    structure with handles and user data (see GUIDATA)

% Hint: get(hObject,'Value') returns toggle state of imcollect


% --- Executes on button press in export_sum.
function export_sum_Callback(hObject, eventdata, handles)
% hObject    handle to export_sum (see GCBO)
% eventdata  reserved - to be defined in a future version of MATLAB
% handles    structure with handles and user data (see GUIDATA)
%Data = get(handles.data_gross,'Data');
clear filenum Round Images Number Intensity_avg Intensity_STE Area_avg Area_STE MAP2_Area MAP2_Intensity_avg Soma_area Soma_Intensity_avg D_size map2 soma Combined_Area
Data = get(handles.uipanel5,'UserData');
map_area = get(handles.map2_area,'UserData');
soma_area = get(handles.soma,'UserData');
rounds = str2double(get(handles.total_round,'String'));
F2 = get(handles.bg_factor_slider,'UserData');
somata = get(handles.mapsoma,'UserData');
filename = ['Data Summary', datestr(now,'dd-mm-yyyy HH:MM PM'),'.xlsx'];
%size(somata)
imagenames = get(handles.text27,'UserData');
P = strings(10,2);
%Data(:,1,1,1:2)
for i = 1:rounds
    D_size = Data(:,1,1,i);
    D_size(D_size==0)=[];
    filenum = size(D_size,1);
    map2 = map_area(:,:,i);
    soma = soma_area(:,:,i);
    if or(get(handles.map2,'Value')==1,get(handles.mapsoma,'Value')==1)
        MAP2_Area = map2(:,1);
        MAP2_Area(filenum+1:end)=[];
        
        MAP2_Intensity_avg = map2(:,2);
        MAP2_Intensity_avg(filenum+1:end)=[];
        
        Soma_area = soma(:,1);
        Soma_area(filenum+1:end)=[];
    
        Soma_Intensity_avg = soma(:,2);
        Soma_Intensity_avg(filenum+1:end)=[];
              
    else
        MAP2_Area = zeros(size(D_size,1),1);
        Soma_area = MAP2_Area;
        MAP2_Intensity_avg = MAP2_Area;
        Soma_Intensity_avg = MAP2_Area;
    end
    
    
    %filenum = size(map2,1);
    Images = transpose(1:1:filenum);
    
    
    
    if isempty(somata)
        Combined_Area = MAP2_Area;
    else
        for j = 1:filenum
            soma_round = somata(j,:,i); % all somata for one image
            soma_round(soma_round==0)=[]; % get rid of 0's
            soma_round = sum(soma_round); % sum the total area
            Combined_Area(j,1) = MAP2_Area(j,1)+soma_round;
        end
    end
    %Combined_Area = transpose(Combined_Area);
    Combined_Area(filenum+1:end)=[];
    
    Round = ones(size(D_size,1),1).*i;
    
    Directory = strings(length(Round),1);
    Directory(:,1) = F2(i);
    
    Image_names = strings(length(Round),1);
    Image_names = imagenames(:,i);
    Image_names(Image_names=='') = [];
    
    Intensity_avg = Data(:,1,1,i);
    Intensity_avg(filenum+1:end)=[];
    
    Intensity_STE = Data(:,2,1,i);
    Intensity_STE(filenum+1:end)=[];
    for a = 1:filenum
        if isempty(Intensity_STE(a))
            Intensity_STE(a) = NaN;
        end
    end
    
    Number = Data(:,3,1,i);
    Number(filenum+1:end)=[];
    
    Area_avg = Data(:,4,1,i);
    Area_avg(filenum+1:end)=[];
    
    Area_STE = Data(:,5,1,i);
    Area_STE(filenum+1:end)=[];
    for b = 1:filenum
        if isempty(Area_STE(b))
            Area_STE(b) = NaN;
        end
    end
    
%     size(Round)
%     size(Images)
%     size(Number)
%     size(Intensity_avg)
%     size(Intensity_STE)
%     size(Area_avg)
%     size(Area_STE)
%     size(MAP2_Area)
%     size(MAP2_Intensity_avg)
%     size(Soma_area)
%     size(Soma_Intensity_avg)
%Combined_Area = transpose(Combined_Area);    

    T = table(Round, Directory, Image_names, Images, Number, Intensity_avg, Intensity_STE, Area_avg, Area_STE,...
        MAP2_Area, MAP2_Intensity_avg, Soma_area,Soma_Intensity_avg, Combined_Area);  
    %full_data = [Round, Images, Number, Intensity_avg, Intensity_STE, Area_avg, Area_STE,...
      %  MAP2_Area, MAP2_Intensity_avg, Soma_area,Soma_Intensity_avg];
    if i == 1
        excel_loc = 1;
        loc2 = excel_loc(i);
        D_size_prev = D_size;
    else
        excel_loc = size(D_size_prev,1);
        D_size_prev = D_size;
        loc2 = loc2+excel_loc+1;
    end
%     locmap = strcat({'G',num2str(loc2)});
%     locsoma = strcat({'J',num2str(loc2)});
if i == rounds
% Create table of parameters
Thresh1 = str2double(get(handles.T1,'String'));
Thresh2 = str2double(get(handles.T2,'String'));
Thresh3 = str2double(get(handles.T3,'String'));
P(2,2) = Thresh1;
P(3,2) = Thresh2;
P(4,2) = Thresh3;
BG_correction = str2double(get(handles.bg_factor,'String'));
P(5,2) = BG_correction;
Dendrite_distance = str2double(get(handles.den_dist,'String'));
P(6,2) = Dendrite_distance;
Max_Size = str2double(get(handles.maxsize,'String'));
P(7,2) = Max_Size;

if get(handles.mapsoma,'Value')==1
    Correlation = 'MAP2+Soma';
else
    if get(handles.map2,'Value')==1
        Correlation = 'MAP2 only';
    else
        Correlation = 'None';
    end
end
P(8,2) = Correlation;
if get(handles.highmap2,'Value')==1
    High_MAP2 = 'On';
else
    High_MAP2 = 'Off';
end
P(9,2) = High_MAP2;
if get(handles.mach_learn,'Value')==0
    Machine_Learning = 'Off';
else
    if get(handles.watershed,'Value')==1
        Machine_Learning = 'On with watershed';
    else
        Machine_Learning = 'On without watershed';
    end          
end
P(10,2) = Machine_Learning;

Parameters = 'Values';
P(1,2) = Parameters;

P1 = ['Parameters       '; 'Thresh1          '; 'Thresh2          '; 'Thresh3          '; 'BG_correction    '; 'Dendrite_distance';...
    'Max_Size         '; 'Correlation      '; 'High_MAP2        '; 'Machine_Learning '];
P(:,1) = P1;
P = cellstr(P);
P = cell2table(P);
end
    loc = strcat('A',num2str(loc2));
    writetable(T,filename,'FileType','spreadsheet','Sheet',1,'Range',loc);
    if i==rounds
        writetable(P,filename,'FileType','spreadsheet','Sheet',1,'Range', 'Q1');
    end
%     xlswrite(filename,map2,1, locmap);
%     xlswrite(filename,soma,1, locsoma);
   %xlswrite(filename, full_data);
   clear Directory Image_names Round Images Number Intensity_avg Intensity_STE Area_avg Area_STE MAP2_Area MAP2_Intensity_avg Soma_area Soma_Intensity_avg D_size map2 soma filenum
end
% table_titles = {'AVG Intensity', 'Int. STE', 'Number', 'Avg Area (um^2)', 'Area STE'};
% xlswrite('Data Summary.xlsx',table_titles,1, 'A1');
% xlswrite('Data Summary.xlsx',Data, 1, 'A2');
 msgbox(strcat({'Data written as "', filename,'" to current directory.'}),'Export');
 
% --- Executes on button press in export_raw.
function export_raw_Callback(hObject, eventdata, handles)
% hObject    handle to export_raw (see GCBO)
% eventdata  reserved - to be defined in a future version of MATLAB
% handles    structure with handles and user data (see GUIDATA)
Data = get(handles.data_sum,'Data');
xlswrite('Raw Data.xlsx',Data);


% --- Executes on button press in export_map.
function export_map_Callback(hObject, eventdata, handles)
% hObject    handle to export_map (see GCBO)
% eventdata  reserved - to be defined in a future version of MATLAB
% handles    structure with handles and user data (see GUIDATA)
Data = get(handles.map2_area,'Data');
xlswrite('Data MAP2.xlsx',Data);


% --- Executes on button press in export_soma.
function export_soma_Callback(hObject, eventdata, handles)
% hObject    handle to export_soma (see GCBO)
% eventdata  reserved - to be defined in a future version of MATLAB
% handles    structure with handles and user data (see GUIDATA)
Data = get(handles.soma,'Data');
xlswrite('Data Soma.xlsx',Data);


function notopt_Callback(hObject, eventdata, handles)
% hObject    handle to notopt (see GCBO)
% eventdata  reserved - to be defined in a future version of MATLAB
% handles    structure with handles and user data (see GUIDATA)

% Hints: get(hObject,'String') returns contents of notopt as text
%        str2double(get(hObject,'String')) returns contents of notopt as a double


% --- Executes during object creation, after setting all properties.
function notopt_CreateFcn(hObject, eventdata, handles)
% hObject    handle to notopt (see GCBO)
% eventdata  reserved - to be defined in a future version of MATLAB
% handles    empty - handles not created until after all CreateFcns called

% Hint: edit controls usually have a white background on Windows.
%       See ISPC and COMPUTER.
if ispc && isequal(get(hObject,'BackgroundColor'), get(0,'defaultUicontrolBackgroundColor'))
    set(hObject,'BackgroundColor','white');
end


function den_dist_Callback(hObject, eventdata, handles)
% hObject    handle to den_dist (see GCBO)
% eventdata  reserved - to be defined in a future version of MATLAB
% handles    structure with handles and user data (see GUIDATA)

% Hints: get(hObject,'String') returns contents of den_dist as text
%        str2double(get(hObject,'String')) returns contents of den_dist as a double


% --- Executes during object creation, after setting all properties.
function den_dist_CreateFcn(hObject, eventdata, handles)
% hObject    handle to den_dist (see GCBO)
% eventdata  reserved - to be defined in a future version of MATLAB
% handles    empty - handles not created until after all CreateFcns called

% Hint: edit controls usually have a white background on Windows.
%       See ISPC and COMPUTER.
if ispc && isequal(get(hObject,'BackgroundColor'), get(0,'defaultUicontrolBackgroundColor'))
    set(hObject,'BackgroundColor','white');
end


% --- Executes on slider movement.
function bg_factor_slider_Callback(hObject, eventdata, handles)
% hObject    handle to bg_factor_slider (see GCBO)
% eventdata  reserved - to be defined in a future version of MATLAB
% handles    structure with handles and user data (see GUIDATA)

% Hints: get(hObject,'Value') returns position of slider
%        get(hObject,'Min') and get(hObject,'Max') to determine range of slider
bg = get(hObject,'Value');
set(handles.bg_factor,'String',bg);

% --- Executes during object creation, after setting all properties.
function bg_factor_slider_CreateFcn(hObject, eventdata, handles)
% hObject    handle to bg_factor_slider (see GCBO)
% eventdata  reserved - to be defined in a future version of MATLAB
% handles    empty - handles not created until after all CreateFcns called

% Hint: slider controls usually have a light gray background.
if isequal(get(hObject,'BackgroundColor'), get(0,'defaultUicontrolBackgroundColor'))
    set(hObject,'BackgroundColor',[.9 .9 .9]);
end


% --- Executes on button press in highmap2.
function highmap2_Callback(hObject, eventdata, handles)
% hObject    handle to highmap2 (see GCBO)
% eventdata  reserved - to be defined in a future version of MATLAB
% handles    structure with handles and user data (see GUIDATA)

% Hint: get(hObject,'Value') returns toggle state of highmap2


function maxsize_Callback(hObject, eventdata, handles)
% hObject    handle to maxsize (see GCBO)
% eventdata  reserved - to be defined in a future version of MATLAB
% handles    structure with handles and user data (see GUIDATA)

% Hints: get(hObject,'String') returns contents of maxsize as text
%        str2double(get(hObject,'String')) returns contents of maxsize as a double


% --- Executes during object creation, after setting all properties.
function maxsize_CreateFcn(hObject, eventdata, handles)
% hObject    handle to maxsize (see GCBO)
% eventdata  reserved - to be defined in a future version of MATLAB
% handles    empty - handles not created until after all CreateFcns called

% Hint: edit controls usually have a white background on Windows.
%       See ISPC and COMPUTER.
if ispc && isequal(get(hObject,'BackgroundColor'), get(0,'defaultUicontrolBackgroundColor'))
    set(hObject,'BackgroundColor','white');
end


% --- Executes on button press in traceexp.
function traceexp_Callback(hObject, eventdata, handles)
% hObject    handle to traceexp (see GCBO)
% eventdata  reserved - to be defined in a future version of MATLAB
% handles    structure with handles and user data (see GUIDATA)
if get(handles.imcollect,'Value')==1
    IMcollect = get(handles.figure_box,'UserData');
else
    warndlg('No images collected!','Notice!');
end
d = cd;
rounds = size(IMcollect,5);

pixnum2 = get(handles.resolution,'Value');
if pixnum2 == 1
    pixnum = 1024; % default if nothing is selected
else
    if pixnum2 == 2
        pixnum = 256;
    else
        if pixnum2 == 3
            pixnum = 512;
        else 
            if pixnum2 == 4
                pixnum = 1024;
            else
                if pixnum2 == 5
                    pixnum = 2048;
                else
                    pixnum = get(handles.resolution,'UserData');
                end
            end
        end
    end
end


i = 1;
while i<=rounds
    % If this is an empty round, then the channels should be all 0
    if max(max(max(IMcollect(:,:,:,1,i)))) == 0
        break;
    end
    foldername = strcat('Round ',num2str(i));
    mkdir(foldername);
    addpath(foldername);
    j = 1;
    while j <=size(IMcollect,4)
        im = IMcollect(:,:,:,j,i);
        maxval = max(max(max(im)));
        if maxval == 0
            break;
        end
        cd(foldername);
        filename = strcat('Image ',num2str(j),'.tif');
        I2 = zeros(size(im,1),size(im,2),3);
        i2 = im;
        if max(max(max(im)))>256
            I3 = uint16(I2);
        else
            I3 = uint8(I2); 
        end
        size(I3)
        size(i2)
        I3(:,:,1) = i2(:,:,1);
        I3(:,:,2) = i2(:,:,2);
        I3(:,:,3) = i2(:,:,3);
        imwrite(I3,filename);
        j = j+1;
        cd(d);
    end
    cd(d);
    i = i+1;
end
msgbox('Export Complete!  Find images in current directory');
